# Supplementary material
Source: publisher figshare collection journal article supplement (https://rs.figshare.com/ndownloader/files/24504029)
Supplement: Supplementary file 1 [file 24504029]

## Sheet: Taxodros presence data
Taxodros presence data. Worldwide records of presence data for Drosophila subobscura from TAXODROS (www.taxodros.uzh.ch/). Locations have been grouped as being from the Native or the Introduced range
Range	Locality	LONG	LAT
Native	skelleftea	21	64.8
Native	umea	20.3	63.8
Native	levanger	11.3	63.8
Native	trondheim	10.4	63.4
Native	kuopio	27.6	62.9
Native	liperi	29.8	62.6
Native	sundsvall	17.3	62.4
Native	finland	24	62
Native	tyrvanto	24.3	61.2
Native	tvarminne	23.2	61.2
Native	hiirisuo	24.3	61.2
Native	joutseno	28.5	61.1
Native	hollola	25.4	61.1
Native	hillevik	16.5	61
Native	gavle	17.2	60.7
Native	dalby/se	13.1	60.6
Native	turku	22.2	60.5
Native	eidfjord	7.1	60.5
Native	bergen	5.5	60.4
Native	ullensvang	6.7	60.3
Native	nato	20	60.2
Native	helsinki	25	60.1
Native	espoo	24.5	60.1
Native	sweden	16	60
Native	norway	8	60
Native	kolmpera	25	60
Native	bromarv	23.1	60
Native	baerum	10.5	60
Native	uppsala	17.6	59.9
Native	sunne	13.1	59.9
Native	oslo	10.8	59.9
Native	leningrad	30.3	59.9
Native	bosjokloster	13.5	59.8
Native	frogn	10.7	59.7
Native	drobak	10.7	59.7
Native	hurum	10.4	59.6
Native	strangnas	17	59.4
Native	narva/ee	28.3	59.4
Native	stockholm	18.1	59.3
Native	boda	17.1	59.3
Native	tjome	10.4	59.1
Native	armadale	-4.1	58.6
Native	sturefors	16	58.5
Native	parnu	24.5	58.5
Native	loch craggie	-4.4	58.5
Native	dalhalvaig	-3.9	58.5
Native	tartu	26.7	58.4
Native	forsinard	-3.9	58.3
Native	altnaharra	-4.4	58.3
Native	lilla edet	12.2	58.2
Native	kristiansand	8	58.2
Native	kildonan	-3.9	58.2
Native	crask	-4.5	58.2
Native	tyresta	18	58
Native	otepaa	26.5	58
Native	loch fleet	-4.1	58
Native	lairg	-4.4	58
Native	erdod	14.3	58
Native	ullapool	-5.2	57.9
Native	dornoch	-4	57.9
Native	ardgay	-4.4	57.9
Native	braemore	-5	57.8
Native	valga	26	57.7
Native	tingstade	18.6	57.7
Native	visby	18.3	57.6
Native	newmill	-3.5	57.6
Native	lhanbryde	-3.2	57.6
Native	glen of drumloch	-3.2	57.6
Native	garve	-4.7	57.6
Native	fochabers	-3.1	57.6
Native	dingwall	-4.4	57.6
Native	brodie	-3.8	57.6
Native	auldearn	-3.8	57.6
Native	tolne	10.3	57.5
Native	spey valley	-4.3	57.5
Native	logie	-3.7	57.5
Native	klinte	18	57.5
Native	inverness	-4.3	57.5
Native	frederikshavn	10.6	57.5
Native	dalcross	-4.1	57.5
Native	bin wood	-2.9	57.5
Native	struy	-4.7	57.4
Native	tomintoul	-3.4	57.3
Native	skye	-6.3	57.3
Native	nethybridge	-3.7	57.3
Native	milton/gb	-4.1	57.3
Native	latvia	27	57.3
Native	laeso	11	57.3
Native	hulknose	10	57.3
Native	grantown	-3.6	57.3
Native	findhorn bridge	-4	57.3
Native	drumnadrochit	-4.5	57.3
Native	blidene	27	57.3
Native	woodside	-2.2	57.2
Native	tofta	12.3	57.2
Native	loch morlich	-3.7	57.2
Native	fort augustus	-4.7	57.2
Native	bucksburn	-2.2	57.2
Native	aberdeen	-2.1	57.2
Native	scotland	-4	57
Native	osterild	8.9	57
Native	newtonhill	-2.2	57
Native	laggan	-4.8	57
Native	inver	-3.3	57
Native	fawsyde	-2.3	56.9
Native	devil's elbow	-3.4	56.9
Native	borgholm	16.7	56.9
Native	upper loch linnhe	-5.2	56.8
Native	rold	9.8	56.8
Native	north water bridge	-2.5	56.8
Native	fort williams	-5.1	56.8
Native	dragstrup	8.7	56.8
Native	dalrulzian	-3.4	56.8
Native	benholm	-2.3	56.8
Native	rannoch	-4.2	56.7
Native	oland	16.5	56.7
Native	mariager	10	56.7
Native	kirriemuir	-3	56.7
Native	brechin	-2.7	56.7
Native	ballachulish	-5.2	56.7
Native	rannoch moor	-4.8	56.6
Native	laxvik	12.9	56.6
Native	grandtully	-3.8	56.6
Native	fearnan	-4.1	56.6
Native	eigg isle	-6.2	56.6
Native	craigvinean forest	-3.7	56.6
Native	blairgowrie	-3.4	56.6
Native	asnen	14.8	56.6
Native	aberfeldy	-3.9	56.6
Native	tyndrum	-4.7	56.5
Native	klosterhede	8.5	56.5
Native	jekabpils	26	56.5
Native	guildtown	-3.4	56.5
Native	enslov	12.8	56.5
Native	oban	-5.5	56.4
Native	insh isle	-5.6	56.4
Native	balquhidder	-4.4	56.4
Native	west learmouth	-2.3	56.3
Native	skalderviken	12.8	56.3
Native	naaege	9.5	56.3
Native	kullaberg	12.5	56.3
Native	kalo	10.3	56.3
Native	iona isle	-6.4	56.3
Native	dumbarnie links	-3	56.3
Native	doune ponds	-4.1	56.3
Native	callander	-4.2	56.3
Native	broby	14.1	56.3
Native	ardlui	-4.7	56.3
Native	aberargie	-3.4	56.3
Native	thornhill	-4.2	56.2
Native	silkeborg	9.7	56.2
Native	mols	10.5	56.2
Native	karlskrona	15.6	56.2
Native	hattenaes	9.6	56.2
Native	gairneybridge	-3.5	56.2
Native	aarhus	10.2	56.2
Native	stilling	10	56.1
Native	inverbeg inn	-4.7	56.1
Native	halsingborg	12.8	56.1
Native	fintry	-4.3	56.1
Native	vestbirk	9.5	56
Native	linseleje	12	56
Native	jura isle	-5.9	56
Native	inverkeithing	-3.4	56
Native	hymbie	-4	56
Native	hunter's quay	-4.9	56
Native	helensburgh	-4.7	56
Native	edinburgh	-3.2	56
Native	denmark	9	56
Native	corstorphine	-3.3	56
Native	cardross	-4.6	56
Native	bonhill	-4.6	56
Native	balloch pier	-4.6	56
Native	alexandria/gb	-4.6	56
Native	aberlady	-2.9	56
Native	pathhead ford	-3	55.9
Native	panevezys	24.4	55.9
Native	liberton	-3.2	55.9
Native	lasswade	-3.2	55.9
Native	gifford	-2.8	55.9
Native	eskbank	-3.1	55.9
Native	dalkeith	-3.1	55.9
Native	bonnyrigg	-3.2	55.9
Native	strathclyde	-5	55.8
Native	penicuik	-3.2	55.8
Native	paisley	-4.4	55.8
Native	moscow	37.7	55.8
Native	islay	-6.2	55.8
Native	heriot	-2.9	55.8
Native	faarevejle	11.5	55.8
Native	dyrehaven	12.5	55.8
Native	claonaig	-5.4	55.8
Native	allindelille	11.8	55.8
Native	vingsted	9.4	55.7
Native	smiltyne	21.1	55.7
Native	munkebjerg	9.7	55.7
Native	lund	13.2	55.7
Native	kingswells	-4.4	55.7
Native	humbie	-3	55.7
Native	hareskoven	12.4	55.7
Native	hallestad	13.4	55.7
Native	geels	12.6	55.7
Native	esperod	14.2	55.7
Native	copenhagen	12.6	55.7
Native	cladville	-5.5	55.7
Native	charlottenlund	12.6	55.7
Native	bjarred	13	55.7
Native	lomma	13.1	55.6
Native	kongelunden	12.3	55.6
Native	kirknewton	-2.2	55.6
Native	juodkrante	21.1	55.6
Native	craigie	-4.5	55.6
Native	carradale	-5.5	55.6
Native	broughton	-3.4	55.6
Native	utena	25.6	55.5
Native	linnerup	9.5	55.5
Native	lellinge	12.1	55.5
Native	jungshoved	12	55.5
Native	gesten	9.2	55.5
Native	ayr/gb	-4.6	55.5
Native	arran isle	-5.2	55.5
Native	wanlockhead	-3.8	55.4
Native	tystrup	11.6	55.4
Native	sandhammaren	14.2	55.4
Native	minishant	-4.7	55.4
Native	leadhills	-3.8	55.4
Native	fano	8.4	55.4
Native	ribe	8.7	55.3
Native	chapeldonan	-4.9	55.3
Native	arreskov	10.3	55.3
Native	holmhead	-4	55.2
Native	brons	8.7	55.2
Native	skovbo	10.5	55.1
Native	ballantrae	-5	55.1
Native	almindingen	14.9	55.1
Native	pabrade	25.8	55
Native	newton-stewart	-4.5	55
Native	newcastle/t	-1.6	55
Native	creca	-3.3	55
Native	clatteringshaws loch	-4.2	55
Native	bagsvaerd	9	55
Native	aso skov	10.8	55
Native	stranraer	-5	54.9
Native	orehoved	11.9	54.9
Native	norre alslev	11.9	54.9
Native	kollund	9.5	54.9
Native	guldborg	11.8	54.9
Native	glenluce	-4.8	54.9
Native	cumstoun bridge	-4.1	54.9
Native	aaso	10.8	54.9
Native	sollested	11.3	54.8
Native	orenaes	12	54.8
Native	estrup	9.8	54.8
Native	doon bay	-4.1	54.8
Native	castle eden dene	-1.4	54.8
Native	vilnius	25.3	54.7
Native	lithuania	25.3	54.7
Native	engestofte	11.5	54.7
Native	slupsk	17	54.5
Native	kiel	10.1	54.3
Native	albersdorf	9.3	54.2
Native	malham tarn	-2.2	54.1
Native	yorkshire	-1	54
Native	heringsdorf	14.2	54
Native	wike	-2	53.8
Native	mellum	9.2	53.8
Native	leeds	-1.6	53.8
Native	rawden hill	-2	53.7
Native	lancashire	-2.8	53.7
Native	schwerin	11.4	53.6
Native	memmert	6.9	53.6
Native	hamburg	10	53.6
Native	schiermonnikoog	6.2	53.5
Native	alt-rehse	12	53.5
Native	neston	-3.1	53.3
Native	hogshead	-2.5	53.3
Native	groningen	6.6	53.2
Native	fintlandsmoor	8.2	53.2
Native	bretby	-1.7	53.2
Native	bangor	-4.1	53.2
Native	gibraltar point	0.3	53.1
Native	luchow	11.2	53
Native	ireland	-8	53
Native	huisduinen	4.7	53
Native	elsloo	6.2	53
Native	eggersdorf	13.5	53
Native	den helder	4.8	53
Native	ter-apel	7.1	52.9
Native	sieversdorf	12.4	52.8
Native	dovedale	-2.3	52.8
Native	wolverhampton	-2.1	52.6
Native	scoulton	0.9	52.6
Native	wernsdorf	13.5	52.5
Native	waldsieversdorf	13.3	52.5
Native	schoneiche	13.7	52.5
Native	oldeneel	6.1	52.5
Native	mazovia	21	52.5
Native	birmingham/gb	-1.8	52.5
Native	berlin	13.4	52.5
Native	nunspeet	5.8	52.4
Native	kallinchen	13.5	52.4
Native	haarlem	4.6	52.4
Native	gomel	31	52.4
Native	gallun	13.5	52.4
Native	brandenburg	12.6	52.4
Native	bloemendaal	4.6	52.4
Native	amsterdam	4.9	52.4
Native	warszawa	21	52.3
Native	putten	5.6	52.3
Native	niederlehme	13.6	52.3
Native	newmarket	0.4	52.3
Native	westbroek	5.1	52.2
Native	wassenaar	4.4	52.2
Native	tienhoven	5.1	52.2
Native	sterrenwacht	4.5	52.2
Native	leiden	4.5	52.2
Native	hilversum	5.2	52.2
Native	cambridge/gb	0.1	52.2
Native	zeist	5.3	52.1
Native	voorschoten	4.4	52.1
Native	veenendaal	5.6	52.1
Native	utrecht	5.1	52.1
Native	soesterberg	5.3	52.1
Native	lunteren	5.6	52.1
Native	loosduinen	4.3	52.1
Native	linschoten	4.9	52.1
Native	leuvenum	5.7	52.1
Native	bunnik	5.2	52.1
Native	alphen	4.7	52.1
Native	winterswijk	6.7	52
Native	volkenrode	10.5	52
Native	steckby	12.1	52
Native	schwanebeck	11.1	52
Native	schobendorf	13.4	52
Native	netherlands	5	52
Native	marzhausen	9	52
Native	hadleigh	1	52
Native	england	-2	52
Native	chithurst	0	52
Native	bookham common	-1	52
Native	bisperode	9.3	52
Native	bielefeld	8.5	52
Native	barton	0.5	52
Native	rozenburg	4.3	51.9
Native	munsterland	7.5	51.9
Native	hecklingen	11.5	51.9
Native	cork	-8.5	51.9
Native	woodchester park	-2	51.8
Native	rothamsted	-0.5	51.8
Native	oxford/gb	-1.3	51.8
Native	hinksey	-1.2	51.8
Native	harpenden	-0.4	51.8
Native	oostkapelle	3.5	51.6
Native	hendon	-0.2	51.6
Native	hellwegebene	8	51.6
Native	ebergotzen	10.1	51.6
Native	buckhurst hill	0.1	51.6
Native	walcheren	3.5	51.5
Native	slough	-0.6	51.5
Native	london	-0.2	51.5
Native	kew	-0.3	51.5
Native	bristol	-2.6	51.5
Native	west wickham	0	51.4
Native	knocke	3.3	51.4
Native	arnsberger wald	8.3	51.4
Native	zeebrugge	3.2	51.3
Native	wytham woods	-1.3	51.3
Native	sevenoaks	0.2	51.3
Native	postel	5.2	51.3
Native	panten	16.2	51.3
Native	blankenberge	3.1	51.3
Native	wye	0.9	51.2
Native	swalmen	6	51.2
Native	kent/gb	0.5	51.2
Native	edersee	9	51.2
Native	tunbridge wells	0.3	51.1
Native	saint-amandsberg	3.8	51.1
Native	destelbergen	3.8	51.1
Native	crowborough	0.2	51.1
Native	schelderode	3.7	51
Native	rogate	-0.9	51
Native	meerdael	5	51
Native	heusden	3.8	51
Native	germany	11	51
Native	gand	3.7	51
Native	belgium	4.5	51
Native	ampton	-1	51
Native	vapenny vrch	15.1	50.9
Native	valkenburg	5.8	50.9
Native	smrk	15.1	50.9
Native	ringwood	-1.8	50.9
Native	raseliniste jizerky	15.1	50.9
Native	polednik	15.1	50.9
Native	oldrichovske sedlo	15.1	50.9
Native	nove mesto	13.7	50.9
Native	na kobyle	15.1	50.9
Native	meerssen	5.8	50.9
Native	maastricht	5.7	50.9
Native	lyndhurst	-1.6	50.9
Native	koln	7	50.9
Native	jena	11.6	50.9
Native	houthem	5.8	50.9
Native	gottingen	8.8	50.9
Native	caberg	5.7	50.9
Native	bukovec	15.1	50.9
Native	budennovka	52.8	50.9
Native	vaals	6	50.8
Native	sussex	-0.2	50.8
Native	obernjesa	8.7	50.8
Native	new forest	-1.7	50.8
Native	labska bouda	15.6	50.8
Native	dvorsky potok	15.6	50.8
Native	canne	5.7	50.8
Native	bruxelles	4.4	50.8
Native	brighton	-0.2	50.8
Native	bily potok	15.3	50.8
Native	altenberg	13.8	50.8
Native	studland	-2	50.7
Native	nimptsch	16.8	50.7
Native	louvain-la-neuve	4.6	50.7
Native	lille	3.1	50.7
Native	duchcov	13.7	50.6
Native	orlicke hory	16.3	50.3
Native	habelschwerdt	16.7	50.3
Native	gleiwitz	18.7	50.3
Native	rauden	18.2	50.1
Native	franzensbad	12.4	50.1
Native	skritek	17	50
Native	czechoslovakia	15	50
Native	czech republic	14	50
Native	scilly islands	-6.3	49.9
Native	amiens	2.3	49.9
Native	vseradice	13.7	49.8
Native	krizovy vrch	16.7	49.8
Native	horni les	14.2	49.6
Native	val	17	49.5
Native	moravia	16.5	49.5
Native	rukavec	14.3	49.4
Native	sobeslav	14.7	49.3
Native	bechyne	14.5	49.3
Native	bartfa	21.3	49.3
Native	veseli	14.7	49.2
Native	trojrohe pleso	20	49.2
Native	borkovice	14.5	49.2
Native	velechvin	14.5	49.1
Native	sevetin	14.6	49.1
Native	branisko	20.8	49.1
Native	berching	11.5	49.1
Native	vlastibor	14	49
Native	trebon	14.8	49
Native	spiegelau	13.4	49
Native	rappersdorf	11.8	49
Native	plesne jezero	13.5	49
Native	ceske budejovice	14.5	49
Native	beilngries	11.5	49
Native	plougrescant	-3.2	48.9
Native	paris	2.3	48.9
Native	langau	15.7	48.9
Native	chlum	14.1	48.9
Native	stuttgart	9.2	48.8
Native	smolnik	20.8	48.8
Native	lednice	16.8	48.8
Native	gif-sur-yvette	2.3	48.8
Native	bayern	11.5	48.8
Native	zadiel	20.8	48.7
Native	rozsnyo	20.5	48.7
Native	roscoff	-4	48.7
Native	plouescat	-4.2	48.7
Native	kyslinky	19.5	48.7
Native	hroncecky grun	19.5	48.7
Native	hrochot	19.4	48.7
Native	taule	-3.9	48.6
Native	penze	-3.8	48.6
Native	ocova	19.3	48.6
Native	obchodita	19.4	48.6
Native	manhartsberg	15.8	48.6
Native	hukava	19.5	48.6
Native	hrinova	19.5	48.6
Native	zwettl	14.3	48.5
Native	tubingen	9.1	48.5
Native	slovakia	19	48.5
Native	pila	17.3	48.5
Native	hammern	14.5	48.5
Native	hadersdorf	15.7	48.5
Native	elorn	-4.3	48.5
Native	aggtelek	20.5	48.5
Native	pfarrkirchen	13	48.4
Native	mukatchevo	22.8	48.4
Native	jugon	-2.3	48.4
Native	fontainebleau	2.7	48.4
Native	stammersdorf	16.4	48.3
Native	mauer	15.4	48.3
Native	kritzendorf	16.3	48.3
Native	kolochava	22.7	48.3
Native	kahlenberg	16.3	48.3
Native	jelenec	18.2	48.3
Native	ige	0.5	48.3
Native	dachau	11.4	48.3
Native	wien	16.4	48.2
Native	novoselitsa	26.3	48.2
Native	freiling	14.2	48.2
Native	schongeising	11.2	48.1
Native	schluifeld	11.3	48.1
Native	rennes	-1.7	48.1
Native	purgstall	15.1	48.1
Native	munchen	11.6	48.1
Native	miskolc	20.8	48.1
Native	kremsmunster	14.1	48.1
Native	ihringen	7.7	48.1
Native	etterschlag	11.5	48.1
Native	colmar	7.4	48.1
Native	bukk-hegy	21.6	48.1
Native	bad hall	14.2	48.1
Native	wurttemberg	9	48
Native	unterheinriet	8	48
Native	scheibbs	15.2	48
Native	saint-urbain	-4	48
Native	saint-jean	-0.4	48
Native	saint-denis d'orques	-0.3	48
Native	rauhenstein	16.2	48
Native	merzhausen	7.8	48
Native	mattsee	13.1	48
Native	kreuzeck	11.1	48
Native	freiburg	7.9	48
Native	boyany	25.5	48
Native	wallersee	13.2	47.9
Native	orleans	1.9	47.9
Native	lunz	15	47.9
Native	loretto	16.5	47.9
Native	kovacov	18.7	47.9
Native	hohenberg	15.6	47.9
Native	concarneau	-3.9	47.9
Native	chateauneuf-sur-loire	2.2	47.9
Native	visegrad	19	47.8
Native	teillay	-1.5	47.8
Native	salzburg	13.1	47.8
Native	neuhaus	15.2	47.8
Native	merishausen	8.6	47.8
Native	lantsch	9.5	47.8
Native	schaffhausen	8.6	47.7
Native	neunkirch	8.5	47.7
Native	lohningen	8.6	47.7
Native	schweikhof	8.9	47.6
Native	scherzingen	9.2	47.6
Native	rudlingen	8.6	47.6
Native	pomaz	19	47.6
Native	marthalen	8.6	47.6
Native	hortobagy	21.2	47.6
Native	golling	13.2	47.6
Native	glattfelden	8.5	47.6
Native	eglisau	8.5	47.6
Native	carnac	-3.1	47.6
Native	basel	7.6	47.6
Native	admont	14.5	47.6
Native	wurenlingen	8.3	47.5
Native	winterthur	8.8	47.5
Native	villnachern	8.2	47.5
Native	untersiggenthal	8.3	47.5
Native	therwil	7.6	47.5
Native	sholokhov	40	47.5
Native	rheineck	9.6	47.5
Native	obertraun	13.7	47.5
Native	mariastein	7.5	47.5
Native	lagern	8.4	47.5
Native	kispest	19.1	47.5
Native	frick	8	47.5
Native	freienstein	8.6	47.5
Native	ermatingen	9.1	47.5
Native	embrach	8.6	47.5
Native	buix	7.1	47.5
Native	budapest	19.1	47.5
Native	bubendorf	7.8	47.5
Native	bregenz	9.8	47.5
Native	zurichberg	8.6	47.4
Native	wangen/zh	8.7	47.4
Native	wangen/so	7.9	47.4
Native	stetten	8.4	47.4
Native	sellenburen	8.5	47.4
Native	rickenbach/so	7.9	47.4
Native	pfaffhausen	8.6	47.4
Native	otwil	8.4	47.4
Native	maur	8.7	47.4
Native	laufen	7.5	47.4
Native	kaferberg	8.5	47.4
Native	honggerberg	8.5	47.4
Native	hagendorf	7.8	47.4
Native	granichen	8.1	47.4
Native	geeren	8.6	47.4
Native	fluntern	8.6	47.4
Native	effretikon	8.7	47.4
Native	dietikon	8.4	47.4
Native	delemont	7.4	47.4
Native	courrendlin	7.4	47.4
Native	birmensdorf	8.4	47.4
Native	bergdietikon	8.4	47.4
Native	alpach	12	47.4
Native	adlisberg	8.6	47.4
Native	aarau	8.1	47.4
Native	vorarlberg	10	47.3
Native	verocemaros	19	47.3
Native	unterlunkhofen	8.4	47.3
Native	stams	11	47.3
Native	sihlwald	8.6	47.3
Native	schlossrued	8.1	47.3
Native	saint-cyr	0.7	47.3
Native	ocsa	19.2	47.3
Native	nanikon	8.7	47.3
Native	mentlberg	11.4	47.3
Native	meilen	8.7	47.3
Native	locherboden	11.4	47.3
Native	kusnacht	8.6	47.3
Native	kilchberg	8.6	47.3
Native	innsbruck	11.4	47.3
Native	hahntennjoch	10.7	47.3
Native	gutenswil	8.7	47.3
Native	etang de gruere	7.1	47.3
Native	egg	8.7	47.3
Native	dijon	5	47.3
Native	buzihutte	11.4	47.3
Native	arzl	11.4	47.3
Native	aristau	8.4	47.3
Native	wadenswil	8.7	47.2
Native	sursee	8.1	47.2
Native	sonceboz	7.2	47.2
Native	pieterlen	7.3	47.2
Native	oberdorf/so	7.5	47.2
Native	les reussilles	7.1	47.2
Native	gyon	19.4	47.2
Native	biel	7.3	47.2
Native	bettlach	7.4	47.2
Native	ruppoldsried	7.4	47.1
Native	risch	8.5	47.1
Native	mollis	9.1	47.1
Native	menzberg	8	47.1
Native	meggen	8.4	47.1
Native	luzern	8.3	47.1
Native	kaserstattalm	11.3	47.1
Native	eggen	8.3	47.1
Native	dierikon	8.4	47.1
Native	badgastein	13.2	47.1
Native	vorauen	9	47
Native	vitznau	8.5	47
Native	vilan	9.6	47
Native	switzerland	9	47
Native	seelisberg	8.6	47
Native	schwanden	9.1	47
Native	saint-blaise	7	47
Native	rochefort/ne	6.8	47
Native	richisau	8.9	47
Native	putz	9.7	47
Native	pizol	9.4	47
Native	peseux	6.9	47
Native	ostermundigen	7.5	47
Native	neuchatel	6.9	47
Native	marin	7	47
Native	landquart	9.6	47
Native	klontal	9	47
Native	hungary	18	47
Native	holzegg	8.7	47
Native	cudrefin	7	47
Native	csevharaszt	20	47
Native	braunwald	9	47
Native	beckenried	8.5	47
Native	agasegyhaza	19.3	47
Native	tihany	17.9	46.9
Native	ramosch	10.4	46.9
Native	pany	9.8	46.9
Native	obergurgl	11	46.9
Native	lienz	12.8	46.9
Native	lakitelek	20	46.9
Native	klewenalp	8.5	46.9
Native	kerns	8.3	46.9
Native	couvet	6.6	46.9
Native	chur	9.5	46.9
Native	altdorf	8.6	46.9
Native	valbella	9.6	46.8
Native	thun	7.6	46.8
Native	scuol	10.3	46.8
Native	rumligen	7.5	46.8
Native	rothenbrunnen	9.5	46.8
Native	nuvilly	6.8	46.8
Native	nationalpark	9.3	46.8
Native	hasliberg	8.2	46.8
Native	ftan	10.2	46.8
Native	font	6.8	46.8
Native	davos	9.9	46.8
Native	cheyres	6.8	46.8
Native	brienz/be	8	46.8
Native	arriach	13.9	46.8
Native	zernez	10.1	46.7
Native	vallorbe	6.4	46.7
Native	simontornya	18.6	46.7
Native	schynige platte	7.9	46.7
Native	portschach	14.1	46.7
Native	niesen	7.6	46.7
Native	munt la schera	10.2	46.7
Native	leutschach	15.5	46.7
Native	lenzerheide	9.6	46.7
Native	il fuorn	10.2	46.7
Native	hauteville	7.1	46.7
Native	goschenen	8.6	46.7
Native	bressanone	11.7	46.7
Native	beatenberg	7.8	46.7
Native	aizenay	-1.6	46.7
Native	verdeil	7.1	46.6
Native	turda	23.8	46.6
Native	trafoi	10.5	46.6
Native	schmelz	34.6	46.6
Native	schafberg	10.5	46.6
Native	savognin	9.6	46.6
Native	san vigilio	11.9	46.6
Native	lucomagno	8.8	46.6
Native	le solliat	6.3	46.6
Native	hospental	8.6	46.6
Native	gomagoi	32.9	46.6
Native	andermatt	8.6	46.6
Native	weisser knott	29.5	46.5
Native	uchizy	4.9	46.5
Native	ravatoi	8.9	46.5
Native	pommiers	1.6	46.5
Native	piotta	8.7	46.5
Native	oberwald	8.4	46.5
Native	munster/vs	8.3	46.5
Native	lutry	6.7	46.5
Native	lausanne	6.7	46.5
Native	glurnser alm	28.5	46.5
Native	faido	8.8	46.5
Native	celerina	9.9	46.5
Native	buchillon	6.4	46.5
Native	bormio	10.4	46.5
Native	bedretto	8.5	46.5
Native	alp flix	9.7	46.5
Native	all'acqua	8.5	46.5
Native	airolo	8.6	46.5
Native	acquarossa	8.9	46.5
Native	sils maria	9.8	46.4
Native	riederalp	8	46.4
Native	nyon	6.3	46.4
Native	noville	6.9	46.4
Native	duillier	6.2	46.4
Native	bignasco	8.6	46.4
Native	biasca	9	46.4
Native	angone	8.9	46.4
Native	visperterminen	7.9	46.3
Native	visp	7.9	46.3
Native	verchiez	7	46.3
Native	someo	8.7	46.3
Native	salgesch	7.6	46.3
Native	pfynwald	7.6	46.3
Native	merlinge	6.3	46.3
Native	maggia	8.7	46.3
Native	lodano	8.7	46.3
Native	leuk	7.7	46.3
Native	lens	7.5	46.3
Native	kunfeherto	19.3	46.3
Native	jussy	6.3	46.3
Native	gy	6.3	46.3
Native	grone	7.5	46.3
Native	gampel	7.8	46.3
Native	finges	7.6	46.3
Native	ecogia	6.2	46.3
Native	dardagny	6	46.3
Native	corsier	6.2	46.3
Native	cevio	8.6	46.3
Native	cerentino	8.6	46.3
Native	biett	8.6	46.3
Native	bex	7	46.3
Native	baltschieder	7.9	46.3
Native	aigle	7	46.3
Native	vernier	6.1	46.2
Native	vandoeuvres	6.2	46.2
Native	tuffer	15.2	46.2
Native	tirano	10.2	46.2
Native	sion	7.4	46.2
Native	sezenove	6.1	46.2
Native	sezegnin	6	46.2
Native	san sebastiano	10	46.2
Native	russin	6	46.2
Native	ronco	8.7	46.2
Native	presinge	6.3	46.2
Native	monnetier	6.2	46.2
Native	minusio	8.8	46.2
Native	mezzano	11.8	46.2
Native	lullier	6.3	46.2
Native	losone	8.8	46.2
Native	locarno	8.8	46.2
Native	les baillets	6.2	46.2
Native	la louviere	6.3	46.2
Native	guttet	7.7	46.2
Native	gordola	8.9	46.2
Native	geneve	6.2	46.2
Native	frontenex	6.2	46.2
Native	cugnasco	8.9	46.2
Native	collenge	6.2	46.2
Native	charrot	6.1	46.2
Native	chancy	6	46.2
Native	cartigny	6	46.2
Native	bolle di magadino	8.9	46.2
Native	bernex	6.1	46.2
Native	bellinzona	9	46.2
Native	avully	6	46.2
Native	attimis	13.3	46.2
Native	arcegno	8.8	46.2
Native	steinbruck	15.2	46.1
Native	saas fee	7.9	46.1
Native	pecs	18.3	46.1
Native	palic	19.8	46.1
Native	montmerle	4.8	46.1
Native	certines	5.3	46.1
Native	caviano	8.8	46.1
Native	brissago	8.7	46.1
Native	branson	7.1	46.1
Native	belluno	12.2	46.1
Native	vezia	8.9	46
Native	riberot	5	46
Native	mergozzo	8.5	46
Native	gandria	9	46
Native	crezy	-1	46
Native	clarafont	5.8	46
Native	carroux	4	46
Native	verbania	8.6	45.9
Native	torcieu	5.4	45.9
Native	saint-germain-au-mont	4.8	45.9
Native	saint-bernard	7.2	45.9
Native	rovereto	11.1	45.9
Native	riva	10.8	45.9
Native	pallanza	8.6	45.9
Native	monte san giorgio	9	45.9
Native	isola madre	8.7	45.9
Native	chasselay	4.8	45.9
Native	cailloux-sur-fontaines	4.9	45.9
Native	saint-maurice-de-beynost	5	45.8
Native	marostica	11.7	45.8
Native	malchesine	10.8	45.8
Native	lyon	4.8	45.8
Native	como	9.1	45.8
Native	treviso	12.3	45.7
Native	san giuseppe di treviso	12.2	45.7
Native	saintes	-0.6	45.7
Native	sainte-foy-les-lyon	4.8	45.7
Native	apatin	19	45.7
Native	villette-de-vienne	4.9	45.6
Native	san dorligo	13.9	45.6
Native	saint-laurent-d'agny	4.7	45.6
Native	la verpilliere	5.2	45.6
Native	dolnja bitnja	14.2	45.6
Native	biganzolo	8.8	45.6
Native	kamarista	19.5	45.5
Native	cogliate	9.2	45.5
Native	backo gradiste	20	45.5
Native	villars/f	0.7	45.4
Native	sonnay	4.9	45.4
Native	saint-etienne	4.4	45.4
Native	padova	11.9	45.4
Native	bellori	11	45.4
Native	abano	11.8	45.4
Native	monte ventolone	11.7	45.3
Native	marcenat	2.8	45.3
Native	venerieu	5.7	45.2
Native	strazilovo	19.9	45.2
Native	sremska kamenica	19.9	45.2
Native	porec	13.6	45.2
Native	popovica	19.9	45.2
Native	pavia	9.2	45.2
Native	mirnyi	39	45.2
Native	gravellone	9.1	45.2
Native	corteolona	9.4	45.2
Native	bosco della fontana	10.8	45.2
Native	stari slankamen	20.3	45.1
Native	fruska gora	19.8	45.1
Native	besse	6.2	45.1
Native	zanjic	19.5	45
Native	verrua	9.4	45
Native	ubinskaya	40	45
Native	simferopol	34.1	45
Native	saint-marcel-les-valence	5	45
Native	saint-antoine	-0.5	45
Native	porto tolle	12.3	45
Native	krasnodar	39	45
Native	kasan	22	45
Native	gotheron	0	45
Native	cres	14.4	45
Native	baillurie	5	45
Native	pola	13.8	44.9
Native	plitvice	15.6	44.9
Native	montgenevre	6.8	44.9
Native	mont genevre	6.8	44.9
Native	brioni	13.8	44.9
Native	batajnica	20.3	44.9
Native	alessandria	8.6	44.9
Native	villar pellice	7.2	44.8
Native	veyras	4.6	44.8
Native	pont-de-la-maye	-0.5	44.8
Native	monte penice	9.3	44.8
Native	mali kazan	22.5	44.8
Native	deliblato	21	44.8
Native	beograd	20.5	44.8
Native	avala	20.5	44.8
Native	vinci	21.6	44.7
Native	saillans	5.2	44.7
Native	novorossijsk	37.8	44.7
Native	aucelon	5.4	44.7
Native	arcachon	-1.2	44.7
Native	sevastopol	33.5	44.6
Native	penne-le-sec	5.3	44.6
Native	maykop	40.8	44.6
Native	goryachy klyuch	39.1	44.6
Native	golubac	21.6	44.6
Native	djerdap	22.5	44.6
Native	barsac	-0.3	44.6
Native	sauternes	-0.4	44.5
Native	cazaux	-1.1	44.5
Native	carasco	9	44.4
Native	topola	20.7	44.3
Native	navodari	28.6	44.3
Native	montauban-sur-l'ouveze	5.5	44.3
Native	petnica	19.9	44.2
Native	castel del rio	11.5	44.2
Native	vallauria	7.3	44.1
Native	monterosso	9.7	44.1
Native	biaz	-1.2	44.1
Native	yugoslavia	21	44
Native	lazar canyon	22	44
Native	lauzon	6	44
Native	kamariste	20.8	44
Native	derventa	19.4	44
Native	charbacotor	81.5	44
Native	uzice	19.9	43.9
Native	leon/f	-1.3	43.9
Native	ganges	3.7	43.9
Native	yining	81.5	43.8
Native	saint-jean de luculles	-3.5	43.8
Native	menton	7.5	43.8
Native	la boissiere	3.5	43.8
Native	ghiaia	10.5	43.8
Native	clapiers	3.2	43.8
Native	bellegarde	4.5	43.8
Native	artuby	6.5	43.8
Native	villefranche-sur-mer	7.3	43.7
Native	saint-gely-du-fesc	3.8	43.7
Native	les baumettes	4.9	43.7
Native	gorges du verdon	6.3	43.7
Native	camargue	4.8	43.7
Native	arles	4.6	43.7
Native	sochi	39.8	43.6
Native	montpellier	3.9	43.6
Native	goc	20.9	43.6
Native	dobro polje	18.5	43.6
Native	beli izvor	20.8	43.6
Native	split	16.5	43.5
Native	santander	-3.8	43.5
Native	orthez	-0.8	43.5
Native	murviel	-3.2	43.5
Native	la venta/e	-6	43.5
Native	espiguette	4.1	43.5
Native	asturias	-6	43.5
Native	sandiche	-6.1	43.4
Native	ravniste	21.5	43.4
Native	puentedeume	-8.2	43.4
Native	plan-de-la-tour	6.6	43.4
Native	la coruna	-8.4	43.4
Native	jastrebac	21.4	43.4
Native	coruna	-8.4	43.4
Native	tjentiste	18.7	43.3
Native	sicevo	22.2	43.3
Native	serignan	3.3	43.3
Native	mostar	17.8	43.3
Native	macerata	13.5	43.3
Native	garonne	1.2	43.3
Native	collobriere	6.3	43.3
Native	bilbao	-2.9	43.3
Native	picos de europa	-4.8	43.2
Native	oloron	-0.6	43.2
Native	entrago	-6.2	43.2
Native	durmitor	19	43.2
Native	saint-gaudens	0.7	43.1
Native	lagrasse	2.6	43.1
Native	fontfroide	3	43.1
Native	uztegui	-2	43
Native	sukhumi	41	43
Native	moulis	1.1	43
Native	makhachkala	47.5	43
Native	kuciste	17.3	43
Native	korcula	17.1	43
Native	italy	12	43
Native	goyas	-8	43
Native	cumbraos	-8.5	43
Native	biograd lake	19.6	42.9
Native	somport	-0.5	42.8
Native	portomouro	-8.7	42.8
Native	pomena	17.4	42.8
Native	pamplona/e	-1.7	42.8
Native	mljet	17.4	42.8
Native	el pedroso	-8.5	42.8
Native	sofiya	23.3	42.7
Native	pristina	21.2	42.7
Native	torla	-0.1	42.6
Native	san vicente/e	-2.7	42.6
Native	punta de reina	-0.7	42.6
Native	ordesa	0	42.6
Native	lokrum	18.2	42.6
Native	leon/e	-5.6	42.6
Native	kupari	18.2	42.6
Native	jaca	-0.6	42.6
Native	elne	3	42.6
Native	berdun	-0.9	42.6
Native	vernet	2.4	42.5
Native	terminillo	13	42.5
Native	talas	72.2	42.5
Native	kotor	18.8	42.5
Native	gherghebil	47.1	42.5
Native	andorra	1.5	42.5
Native	sozopol	27.7	42.4
Native	gunib	47	42.4
Native	caralps	2.2	42.4
Native	burgos	-3.7	42.4
Native	skutarisee	19.2	42.3
Native	puerto de la selva	3.2	42.3
Native	primorsko	27.8	42.3
Native	pobla de lillet	2	42.3
Native	pedroso/e	-2.7	42.3
Native	corte	9.1	42.3
Native	castellar d'en huch	2	42.3
Native	queralbs	2.2	42.2
Native	olot	2.5	42.2
Native	armentera	3.1	42.2
Native	san domino	13.5	42.1
Native	peramola	1.3	42.1
Native	manziana	12.1	42.1
Native	las planas	2.5	42.1
Native	huesca	-0.4	42.1
Native	lozenec	23	42
Native	la magdalena	-4	42
Native	gerona	2.8	42
Native	coscollet	1	42
Native	corsica	9	42
Native	caucasus	45	42
Native	cantonigros	2	42
Native	bordils	2.9	42
Native	ager	0.8	42
Native	viladrau	2.4	41.9
Native	settecamini	12.5	41.9
Native	ponte mammolo	12.5	41.9
Native	pietralata	12.5	41.9
Native	llafranc	3.2	41.9
Native	castelporziano	12.5	41.9
Native	foresta umbra	16	41.8
Native	zaragoza/e	-0.9	41.7
Native	malgrat	2.8	41.7
Native	sabadell	2.1	41.6
Native	lerida/e	0.6	41.6
Native	calella del mar	2.7	41.6
Native	zamora/e	-5.8	41.5
Native	toro/e	-5.4	41.5
Native	san cugat	2.1	41.5
Native	pina de ebro	-0.6	41.5
Native	ofir	-8.8	41.5
Native	miranda do douro	-6.3	41.5
Native	melnik	23.4	41.5
Native	los monegros	-0.5	41.5
Native	zonguldak	31.8	41.4
Native	tibidabo	2.1	41.4
Native	murca	-7.5	41.4
Native	la rabassada	2.2	41.4
Native	barcelona/e	2.2	41.4
Native	vironia	23.2	41.3
Native	samsun	36.4	41.3
Native	sabaudia	13	41.3
Native	neo petritsi	23.3	41.3
Native	formia	13.6	41.3
Native	el prat de llobregat	2.1	41.3
Native	castellarnau	2.2	41.3
Native	beles	23.2	41.3
Native	san felice circeo	13.1	41.2
Native	porto	-8.6	41.2
Native	kerkini	23.1	41.2
Native	drama	24.2	41.2
Native	tarragona	1.3	41.1
Native	ohrid	20.8	41.1
Native	lamego	-7.8	41.1
Native	trabzon	39.7	41
Native	rasquera	0.6	41
Native	penaroya	-0.5	41
Native	granitis	24	41
Native	arroyo de la vid	-3	41
Native	vale de cambra	-8.4	40.9
Native	ponza	13	40.9
Native	chinaz	68.7	40.9
Native	vesuvio	14.4	40.8
Native	ventonene	13.4	40.8
Native	thasos	24.7	40.8
Native	abant	31.5	40.8
Native	viseu	-7.9	40.7
Native	navacerrada	-4	40.7
Native	martina franca	17.3	40.7
Native	delta ebro	0.7	40.7
Native	thessaloniki	23	40.6
Native	san lorenco del escorial	-4.2	40.6
Native	kastoria	21.3	40.6
Native	escorial	-4.1	40.6
Native	alghero	8.3	40.6
Native	samothraki	25.5	40.5
Native	noguera	-1.6	40.5
Native	vallecas	-3.6	40.4
Native	penarroya	-0.7	40.4
Native	madrid	-3.7	40.4
Native	foresta di burgos	9	40.4
Native	baku	49.9	40.4
Native	dorgali	9.6	40.3
Native	covilha	-7.5	40.3
Native	cala di gonone	9.6	40.3
Native	alfano	15.5	40.3
Native	san nicola	15.5	40.2
Native	lagoa escura	-7.7	40.2
Native	bursa	29.1	40.2
Native	litochoron	22.5	40.1
Native	fundao	-7.5	40.1
Native	benicasim	0.1	40.1
Native	alpedrinha	-7.5	40.1
Native	alcaide	-7.4	40.1
Native	uztequi	-2	40
Native	shagulut	35	40
Native	sardinia	9	40
Native	menorca	4	40
Native	lardosa	-7.5	40
Native	ilha das flores	-30	40
Native	iativa	-4	40
Native	greece	22	40
Native	cabo de formentator	3.2	40
Native	brincola	-5	40
Native	barragem do caia	-8	40
Native	viver	-0.6	39.9
Native	pombal	-8.6	39.9
Native	pollensa	3	39.9
Native	monte redondo	-8.8	39.9
Native	tajo	-5.8	39.8
Native	serta	-8.1	39.8
Native	pe de serra	-7.6	39.8
Native	marinha grande	-8.9	39.8
Native	castelo branco	-7.5	39.8
Native	son cervera	3.2	39.7
Native	sagunto	-0.3	39.7
Native	mallorca	3	39.7
Native	esporles	2.6	39.7
Native	capdepera	3.4	39.7
Native	benitses	19.8	39.7
Native	zeravshan	67.1	39.6
Native	ribarroja	-0.6	39.6
Native	palma de mallorca	2.7	39.6
Native	drosseron	21.8	39.6
Native	calvia	2.5	39.6
Native	andraitx	-2.4	39.6
Native	villacidro	8.7	39.5
Native	valencia/e	-0.4	39.5
Native	puerto de andraitx	2.7	39.5
Native	pindos	21.5	39.5
Native	ludo	-8.5	39.5
Native	la canada	-1	39.5
Native	korydallos	21.5	39.5
Native	flores	-31.2	39.5
Native	fajazinha	-31.3	39.5
Native	cheste	-0.7	39.5
Native	baleares	3	39.5
Native	aldaya	-0.5	39.5
Native	peniche	-9.4	39.4
Native	paul do boquilobo	-8.5	39.4
Native	castelo de vide	-7.5	39.4
Native	sette fratelli	9.5	39.3
Native	portalegre	-7.4	39.3
Native	magdalena/azores	-31.2	39.3
Native	iglesias	8.5	39.3
Native	domusnovas	8.7	39.3
Native	cuglieri	9.6	39.3
Native	vale de santarem	-8.8	39.2
Native	tapada	-8.8	39.2
Native	cartaxo	-8.8	39.2
Native	cagliari	9.1	39.2
Native	alcoentre	-9	39.2
Native	preveza	20.8	39
Native	couco	-8.3	39
Native	campo maior	-7.1	39
Native	azores	-30	39
Native	alferce	-8	39
Native	tejo	-9	38.9
Native	mora	-8.2	38.9
Native	karpenissi	21.8	38.9
Native	ibiza	1.4	38.9
Native	vale de lobos	-9.3	38.8
Native	stromboli	15.3	38.8
Native	sintra	-9.4	38.8
Native	sacavem/p	-9.1	38.8
Native	praia da adraga	-9.5	38.8
Native	lenkoran	48.8	38.8
Native	capuchos	-9.4	38.8
Native	alto do monge	-9.4	38.8
Native	almocageme	-9.5	38.8
Native	vendas novas	-8.5	38.7
Native	ustica	13.2	38.7
Native	terceira	-27.2	38.7
Native	sintra-colares	-9.2	38.7
Native	pegoes	-8.6	38.7
Native	ortahisar	34.7	38.7
Native	monte brasil	-27.2	38.7
Native	lisboa	-9.1	38.7
Native	kara-kala	56.3	38.7
Native	angra	-27.2	38.7
Native	montemor-o-novo	-8.2	38.6
Native	faial	-28.7	38.6
Native	pico	-28.3	38.5
Native	parnes	22.5	38.5
Native	mount parnes	22.6	38.5
Native	lipari	15	38.5
Native	lagoa de albufeira	-9.1	38.5
Native	arrabida	-9	38.5
Native	aldeia de irmaos	-8.9	38.5
Native	sezimbra	-9.1	38.4
Native	ilha do pico	-28.1	38.4
Native	alfarim	-9.2	38.4
Native	alcacer do sal	-8.5	38.4
Native	venta de cardena	-4.3	38.3
Native	elche	-0.7	38.3
Native	cephallonia	20.5	38.3
Native	prado	-8.5	38.2
Native	patras	21.7	38.2
Native	grandola	-8.6	38.2
Native	cinisi	13.1	38.2
Native	mount ainos	20.7	38.1
Native	monreale	13.3	38.1
Native	sines	-8.9	38
Native	murcia	-1.1	38
Native	liontari	23	38
Native	kalavrita	22.1	38
Native	ermidas	-8.4	38
Native	boquilebo	-8	38
Native	athens/gr	23.7	38
Native	adamuz	-4.5	38
Native	randazzo	15	37.9
Native	nebrodi	15	37.9
Native	cordoba/e	-4.8	37.9
Native	villares	-3.8	37.8
Native	rogil	-8.7	37.8
Native	porto covo	-8.8	37.8
Native	jimena	-3.5	37.8
Native	isparta	30.5	37.8
Native	etna	15	37.8
Native	fataca	-8.7	37.7
Native	calanas	-6.9	37.7
Native	vytina	22.3	37.6
Native	nicolosi	15	37.6
Native	sicily	14	37.5
Native	sao miguel	-25.5	37.5
Native	poros	23.5	37.5
Native	kopetdag	57.5	37.5
Native	furnas/azores	-25.3	37.5
Native	andalucia	-5	37.5
Native	rasht	49.6	37.3
Native	huelva	-6.9	37.3
Native	dushak	60	37.3
Native	bizerte	9.9	37.3
Native	aljezur	-8.8	37.3
Native	silves	-8.4	37.2
Native	punta umbria	-7	37.2
Native	karaman	33.2	37.2
Native	granada/e	-3.6	37.2
Native	bensafrim	-8.7	37.2
Native	barranco do velho	-7.9	37.2
Native	sparte	22.4	37.1
Native	sao bras de aportel	-7.9	37.1
Native	lagos/p	-8.7	37.1
Native	camlidere	39.1	37.1
Native	albufeira	-8.3	37.1
Native	sao pedro/azores	-25.1	37
Native	santa maria/azores	-25.1	37
Native	praia da rocha	-8.5	37
Native	petalidion	21.9	37
Native	donana	-6	37
Native	tarsus	34.9	36.9
Native	tabarka	8.8	36.9
Native	rioja	-2.4	36.9
Native	pechina	-2.4	36.9
Native	orgiva	-3.4	36.9
Native	kos	27.3	36.9
Native	cevlik	30.7	36.9
Native	antalya	30.7	36.9
Native	sanlucar	-6.4	36.8
Native	ronda	-5.2	36.8
Native	orangerie	10.2	36.8
Native	belvedere	10.2	36.8
Native	almeria	-2.4	36.8
Native	alger	3	36.8
Native	monemvasia	23.1	36.7
Native	malaga	-4.4	36.7
Native	djebel bou kournine	10.3	36.7
Native	chalus	51.4	36.7
Native	bogcagis	33.5	36.7
Native	puerto de santa maria	-6.2	36.6
Native	akkum	34.3	36.6
Native	shahi	52.9	36.5
Native	silifke	34	36.4
Native	yazir	29.9	36.3
Native	puerto de galiz	-6	36.3
Native	karaovabeli	29.7	36.3
Native	el kef	9.3	36.2
Native	balzan	14.5	35.9
Native	tanger	-5.8	35.8
Native	buskett	14.5	35.8
Native	alikianou	23.9	35.5
Native	nida	25	35.3
Native	iraklio	25.1	35.3
Native	fodele	24	35.3
Native	sitia	26.1	35.2
Native	crete	25	35.2
Native	chefchauen	-6.3	35.2
Native	ziros	26.1	35.1
Native	zakros	26.2	35.1
Native	piso moni preveli	25	35
Native	ifrane	-5	35
Native	diarizos	33	35
Native	buskett gardens	14.5	35
Native	assitaes	26	35
Native	ain draham	8.7	34.8
Native	horsh ehden	36	34.3
Native	chechouan	-5	34
Native	ksara	35.7	33.9
Native	gabes	10.1	33.9
Native	beirut	35.5	33.9
Native	sofar	35.7	33.8
Native	chtaura	35.8	33.8
Native	asfouriye	35.5	33.8
Native	ain anub	35.5	33.8
Native	azrou	-5.2	33.5
Native	neot mordechai	35.6	33.2
Native	kiriat shmonah	35.6	33.2
Native	eilon	35.2	33.1
Native	bar'am	35.4	33.1
Native	rosh pina	35.5	33
Native	naharia	35.1	33
Native	morocco	-8	33
Native	hokook	35	33
Native	hazor	35.6	33
Native	biria	35.5	33
Native	tamra	35.2	32.9
Native	hookuk	35.5	32.9
Native	ginossar	35.5	32.9
Native	haifa	35	32.8
Native	carmel/israel	35	32.8
Native	ribeiro frio	-16.8	32.7
Native	poiso	-16.9	32.7
Native	oranim	35.1	32.7
Native	ein carmel	35	32.7
Native	curral das freiras	-17	32.7
Native	madeira	-16.9	32.6
Native	maayan zvi	34.9	32.6
Native	dor	34.9	32.6
Native	hertzlia	34.8	32.2
Native	petah tikva	34.9	32.1
Native	rishon lezion	34.8	32
Native	richon lezion	34.8	32
Native	biryah	35	32
Native	nueima	35.5	31.9
Native	jerico	35.5	31.9
Native	mevasseret	35.2	31.8
Native	marrakech	-8	31.8
Native	kiriat anavim	35.1	31.8
Native	jerusalem	35.2	31.8
Native	ein feshcha	35.5	31.7
Native	ashkelon	34.6	31.7
Native	yad mordehai	34.6	31.6
Native	essaouira	-9.8	31.5
Native	ein gedi	35.4	31.5
Native	beer sheba	34.8	31.3
Native	asni	-7.9	31.2
Native	alexandria/egypt	29.9	31.2
Native	ait-melloul	-9.5	30.4
Native	agadir	-9.6	30.4
Native	admin	-9.5	30.3
Native	cairo	31.3	30.1
Native	esni	-9	30
Native	los tilos	-17.7	28.8
Native	la palma/canary	-17.8	28.7
Native	brena alta	-17.8	28.7
Native	canary	-14.2	28.5
Native	tenerife	-16.6	28.3
Native	vilaflor	-16.6	28.2
Native	hermigua	-17.2	28.2
Native	guia/canary	-15.6	28.1
Native	gomera	-17.2	28.1
Native	la esperanza	-16.5	28
Native	gran canaria	-15.6	28
Native	esperanza/cny	-15	28
Native	el cedro	-17	28
Native	hierro	-18	27.8
Native	el hierro	-17.9	27.8
Introduced	port hardy	-127.5	50.7
Introduced	peachland	-119.8	49.8
Introduced	port coquitlam/bc	-122.8	49.3
Introduced	vancouver/bc	-123.1	49.1
Introduced	bellingham/wa	-122.3	49
Introduced	victoria/bc	-123.7	48.8
Introduced	port townsend/wa	-122.8	48.2
Introduced	arlington/wa	-122.2	48.2
Introduced	methow/wa	-120	48.1
Introduced	dupont/wa	-123.1	48.1
Introduced	alta loma/wa	-122	48
Introduced	cheney/wa	-117.6	47.5
Introduced	centralia/wa	-123	46.7
Introduced	gaston/or	-123.2	45.4
Introduced	woodburn	-122.9	45.2
Introduced	goldendale/wa	-120.8	45.1
Introduced	salem/or	-123	45
Introduced	medford/or	-122.9	42
Introduced	cave junction/or	-123.6	42
Introduced	eureka/ca	-124.2	40.8
Introduced	redding/ca	-122.4	40.6
Introduced	american fork/ut	-111.7	40.4
Introduced	paradise/ca	-121.6	39.8
Introduced	fort bragg/ca	-123.7	39.5
Introduced	truckee/ca	-120.2	39
Introduced	genoa/nv	-119.9	39
Introduced	placerville/ca	-120.8	38.7
Introduced	davis/ca	-121.8	38.6
Introduced	winters/ca	-122	38.1
Introduced	mount saint helena/ca	-122.6	38.1
Introduced	el rio/ca	-121.5	38
Introduced	mather	-119.9	37.9
Introduced	groveland	-120.2	37.1
Introduced	gilroy/ca	-121.6	37
Introduced	atascadera	-120.7	35.5
Introduced	santa margarita/ca	-120.6	35.4
Introduced	ojai (CA)	-119.4	34.8
Introduced	la serena	-71.3	-29.9
Introduced	san juan/argent	-68.5	-31.6
Introduced	los vilos	-71.6	-31.9
Introduced	mendoza/arg	-68.9	-32.8
Introduced	vina del mar	-71.6	-33
Introduced	la campana	-71	-33
Introduced	cerro de la campana	-70	-33
Introduced	santiago/chile	-70.7	-33.5
Introduced	la florida	-71	-33.5
Introduced	bellavista/chile	-70.5	-33.5
Introduced	san gabriel/chile	-71	-33.6
Introduced	maipu	-68.8	-33.6
Introduced	melocoton	-71	-33.7
Introduced	boca del sarandi	-53.8	-34
Introduced	rapel	-71	-34.3
Introduced	banados de rocha	-54.4	-34.5
Introduced	illapel	-71.2	-34.7
Introduced	curico	-71.3	-35
Introduced	talca	-71.7	-35.5
Introduced	chillan	-72.2	-36.6
Introduced	salto de laja	-70	-37.2
Introduced	tandil	-59.2	-37.3
Introduced	laja	-72.8	-37.3
Introduced	los angeles/chile	-72.4	-37.5
Introduced	mar del plata	-57.5	-38
Introduced	temuco	-72.7	-38.8
Introduced	pucon	-71.9	-39.3
Introduced	valdivia/chile	-73.3	-39.8
Introduced	puyehue	-72.3	-40.7
Introduced	nahuel huapi	-71.2	-41.1
Introduced	bariloche	-71.3	-41.2
Introduced	puerto montt	-73	-41.5
Introduced	castro/chile	-73.8	-42.5
Introduced	esquel	-71.3	-42.9
Introduced	coihaique	-72.1	-45.6
Introduced	aisen	-73	-46.5
Introduced	punta arenas	-70.9	-53.2

## Sheet: Chromosome inversion frequency
Chromosomal inversion frequency for the 5 chromosomes (A, J, U, O and E) of Drosophila subobscura. Inversions in the introduced area have been considered "cold" or "warm" adapted according to their positive or negative correlation with latitude in the native area. "nonAm" chromosomal inversions in the native area non present in America have been combined per chromosome. Data from published record…
				cold	warm	nonAm	wam	cold	nonAm	warm	cold	warm	nonAm	cold	warm	warm	warm	warm	nonAm	cold	warm	warm	warm	warmAm	cold	nonAm	nonAm
Area	Loc	Lat	Lon	A.St	A.2	A.X	J.1	J.St	J.X	U.1.2	U.St	U.1.2.8	U.X	E.St	E.1.2.9.12	E.1.2	E.1.2.9	E.1.2.9.3	E.X	O.St	O.3.4	O.3.4.8	O.3.4.7	O.3.4.2	O.5	O.7	O.X
Native	Gavle	60.67	18.5	NA	NA	NA	NA	NA	NA	NA	NA	NA	NA	NA	NA	NA	NA	NA	NA	0.62963	0	0	0	0	0.037037	0	0.333333	cold
Native	Tyrvan	60.17	24.97	0.96	0	0.04	0.068966	0.931034	0	0	1	0	0	1	0	0	0	0	0	0.535714	0	0	0	0	0	0	0.464286	cold
Native	Sunne	59.83	13.32	0.75	0	0.25	0.103896	0.896104	0	0.05	0.95	0	0	1	0	0	0	0	0	0.596639	0	0	0	0	0.142857	0	0.260504	cold
Native	Sunne	59.83	13.15	1	0	NA	0.111111	0.888889	NA	0.057971	0.942029	0	NA	1	0	0	0	0	NA	0.807692	0	0	0	0	0.192308	0	NA	cold
Native	Sunne	59.83	13.15	0.978261	0.021739	NA	0.213333	0.786667	NA	0.067568	0.891892	0.040541	NA	0.973333	0	0.026667	0	0	NA	0.835821	0.044776	0.029851	0	0	0.089552	0	NA	cold
Native	Drobak	59.66	10.63	0.935484	0.064516	NA	0.108108	0.891892	NA	0.040541	0.959459	0	NA	1	0	0	0	0	NA	0.857143	0	0	0	0	0.142857	0	NA	cold
Native	Drobak	59.66	10.63	0.962264	0.037736	NA	0.261905	0.738095	NA	0.134146	0.865854	0	NA	0.988095	0	0.011905	0	0	NA	0.926471	0.044118	0	0	0	0.029412	0	NA	cold
Native	Lilla_Edet	58.17	12.33	NA	NA	NA	NA	NA	NA	NA	NA	NA	NA	NA	NA	NA	NA	NA	NA	0.821429	0	0	0	0	0.017857	0	0.160714	cold
Native	Fort_August	57.17	-4.68	1	0	0	0.046875	0.953125	0	0.865385	0.064103	0	0.070513	0.773585	0	0.226415	0	0	0	0.560241	0.228916	0	0	0	0	0	0.210843	cold
Native	Edinburgh	55.95	-3.22	NA	NA	NA	NA	NA	NA	NA	NA	NA	NA	NA	NA	NA	NA	NA	NA	0.42	0.32	0	0	0	0	0	0.26
Native	Dalkeith	55.9	-3.03	1	0	0	0.183333	0.816667	0	0.85	0.15	0	0	0.916667	0	0.083333	0	0	0	0.65	0.35	0	0	0	0	0	0	cold
Native	Humbie	55.85	-2.87	NA	NA	NA	NA	NA	NA	NA	NA	NA	NA	NA	NA	NA	NA	NA	NA	0.594203	0.15942	0	0	0	0	0	0.246377	cold
Native	Heriot	55.75	-2.97	1	0	0	0.116667	0.883333	0	0.816667	0	0	0.183333	1	0	0	0	0	0	0.733333	0.266667	0	0	0	0	0	0	cold
Native	Gesten	55.53	9.18	NA	NA	NA	NA	NA	NA	NA	NA	NA	NA	NA	NA	NA	NA	NA	NA	0.771084	0.072289	0.024096	0	0.072289	0	0	0.060241	cold
Native	Groningen	53.25	6.55	0.8	0.04	0.16	0.295302	0.704698	0	0.167785	0.751678	0.04698	0.033557	0.95302	0.013423	0.006711	0	0.020134	0.006711	0.85906	0.040268	0	0	0	0.033557	0	0.067114	cold
Native	Groningen	53.22	6.58	0.830769	0.169231	NA	0.443396	0.556604	NA	0.44	0.48	0.08	NA	0.798165	0.009174	0.174312	0.018349	0	NA	0.552083	0.197917	0.25	0	0	0	0	NA	cold
Native	Ter_Appel	52.88	7.67	NA	NA	NA	NA	NA	NA	NA	NA	NA	NA	NA	NA	NA	NA	NA	NA	0.686131	0.10219	0.145985	0	0	0	0	0.065693	cold
Native	London	51.5	-0.17	NA	NA	NA	NA	NA	NA	NA	NA	NA	NA	NA	NA	NA	NA	NA	NA	0.379032	0.459677	0.112903	0	0	0	0	0.048387
Native	Sussex	50.92	0.25	NA	NA	NA	0.625	0.375	0	0.875	0.055	0.035	0.035	0.61	0.025	0.36	0	0	0.005	0.44	0.425	0.12	0.005	0	0	0	0.01
Native	Louvainlaneuve	50.72	4.62	0.986486	0.013514	NA	0.402597	0.597403	NA	0.346667	0.52	0.133333	NA	0.855263	0	0.105263	0.039474	0	NA	0.730769	0.128205	0.141026	0	0	0	0	NA	cold
Native	Louvainlaneuve	50.72	4.62	0.872093	0.127907	NA	0.387387	0.612613	NA	0.62037	0.324074	0.055556	NA	0.693694	0.063063	0.207207	0.036036	0	NA	0.415094	0.207547	0.358491	0	0.009434	0.009434	0	NA	cold
Native	Crecy	48.85	2.92	NA	NA	NA	NA	NA	NA	NA	NA	NA	NA	NA	NA	NA	NA	NA	NA	0.528736	0.218391	0.195402	0	0	0	0	0.057471	cold
Native	Taule	48.6	-5.9	NA	NA	NA	NA	NA	NA	NA	NA	NA	NA	NA	NA	NA	NA	NA	NA	0.414634	0.158537	0.268293	0.02439	0	0.012195	0	0.121951
Native	Tubingen	48.53	9.07	0.884058	0.115942	NA	0.408537	0.591463	NA	0.248555	0.693642	0.057803	NA	0.948276	0.005747	0.011494	0.034483	0	NA	0.856322	0.074713	0.068966	0	0	0	0	NA	cold
Native	Tubingen	48.53	9.07	0.539823	0.070796	0.389381	0.408537	0.591463	0	0.242938	0.677966	0.056497	0.022599	0.942857	0.005714	0.011429	0.034286	0	0.005714	0.827778	0.072222	0.066667	0	0	0	0	0.033333	cold
Native	Tubingen	48.53	9.07	0.875	0.125	NA	0.425532	0.574468	NA	0.48913	0.478261	0.032609	NA	0.903226	0.032258	0.043011	0.021505	0	NA	0.633333	0.166667	0.2	0	0	0	0	NA	cold
Native	Fontainebleau	48.4	2.7	0.759259	0.092593	0.148148	0.481481	0.518519	0	0.388889	0.537037	0.018519	0.055556	0.861111	0.009259	0.12037	0	0.009259	0	0.722222	0.111111	0.138889	0	0.009259	0	0	0.018519	cold
Native	Vienna	48.22	16.37	0.926829	0.073171	NA	0.463768	0.536232	NA	0.185185	0.805556	0.009259	NA	0.891473	0	0.031008	0.077519	0	NA	0.866142	0.086614	0.023622	0	0	0.023622	0	NA	cold
Native	Vienna	48.22	16.37	0.860656	0.139344	NA	0.468421	0.531579	NA	0.329032	0.632258	0.03871	NA	0.875	0.011905	0.047619	0.065476	0	NA	0.690058	0.216374	0.081871	0	0.011696	0	0	NA	cold
Native	Vienna	48.22	16.37	0.570461	0.086721	0.342818	0.463415	0.536585	0	0.097429	0.742896	0.009472	0.150203	0.787263	0.001355	0.025745	0.069106	0	0.116531	0.747626	0.103121	0.017639	0.001357	0.008141	0.010855	0	0.111262	cold
Native	Teillay	48.17	1.98	0.7	0.2625	0.0375	0.633333	0.366667	0	0.341667	0.366667	0.158333	0.133333	0.65	0.008333	0.291667	0.041667	0	0.008333	0.260504	0.361345	0.285714	0.008403	0.016807	0	0	0.067227
Native	Chateauneuf	47.87	2.23	0.666667	0.083333	0.25	NA	NA	NA	0.180905	0.648241	0.100503	0.070352	0.718593	0.01005	0.211055	0.050251	0	0.01005	0.767677	0.030303	0.161616	0.020202	0.010101	0	0	0.010101	cold
Native	Louvaines	47.7	-0.8	NA	NA	NA	NA	NA	NA	NA	NA	NA	NA	NA	NA	NA	NA	NA	NA	0.702703	0.108108	0.148649	0	0.013514	0	0	0.027027	cold
Native	Eglisau	47.57	8.53	0.650735	0.080882	0.268382	NA	NA	NA	0.239915	0.670913	0.059448	0.029724	0.889831	0.010593	0.040254	0.019068	0	0.040254	0.860169	0.019068	0.080508	0	0.029661	0	0	0.010593	cold
Native	Zurich	47.38	8.53	0.677778	0.077778	0.244444	0.39375	0.60625	0	0.255556	0.634722	0.041667	0.068056	0.873611	0.004861	0.061111	0.017361	0.002778	0.040278	0.833333	0.051389	0.070833	0.000694	0.004167	0.006944	0	0.032639	cold
Native	Kusnacht	47.32	8.58	0.599138	0.051724	0.349138	NA	NA	NA	0.169675	0.720217	0.090253	0.019856	0.860759	0.019892	0.039783	0.039783	0	0.039783	0.850181	0.039711	0.079422	0	0.019856	0	0	0.01083	cold
Native	Oberdorf	47.23	7.52	0.642857	0.119048	0.238095	NA	NA	NA	0.262136	0.660194	0.067961	0.009709	0.882927	0.009756	0.068293	0.009756	0	0.029268	0.863415	0.04878	0.058537	0	0.009756	0	0	0.019512	cold
Native	Vitznau	47.02	8.48	0.712644	0.068966	0.218391	0.401408	0.598592	0	0.167832	0.727273	0.041958	0.062937	0.852113	0	0.098592	0.042254	0	0.007042	0.809859	0.049296	0.112676	0	0.021127	0	0	0.007042	cold
Native	Braunwald	46.93	9	0.671053	0.131579	0.197368	0.352041	0.647959	0	0.19898	0.75	0.040816	0.010204	0.897959	0.010204	0.020408	0.05102	0	0.020408	0.837563	0.030457	0.030457	0	0.040609	0	0	0.060914	cold
Native	Ftan	46.87	10.27	0.613445	0.067227	0.319328	NA	NA	NA	0.20122	0.719512	0.04878	0.030488	0.836364	0	0.042424	0.030303	0	0.090909	0.79878	0.121951	0.030488	0	0.018293	0	0	0.030488	cold
Native	Thun	46.75	7.63	0	1	0	NA	NA	NA	0.269939	0.662577	0.067485	0	0.908537	0.012195	0	0.060976	0	0.018293	0.810976	0.04878	0.109756	0	0.018293	0	0	0.012195	cold
Native	Aizenay	46.73	-1.62	NA	NA	NA	NA	NA	NA	NA	NA	NA	NA	NA	NA	NA	NA	NA	NA	0.375	0.1125	0.4375	0	0	0	0	0.075
Native	Zernez	46.7	11.17	NA	NA	NA	NA	NA	NA	NA	NA	NA	NA	NA	NA	NA	NA	NA	NA	0.230769	0.307692	0.153846	0	0	0	0	0.307692
Native	Leuk	46.32	7.65	0.775281	0.224719	NA	0.532	0.468	NA	0.484444	0.377778	0.137778	NA	0.802469	0.00823	0.127572	0.057613	0.004115	NA	0.665323	0.153226	0.169355	0	0.004032	0.004032	0.004032	NA	cold
Native	Leuk	46.32	7.65	0.764706	0.235294	NA	0.587302	0.412698	NA	0.596639	0.344538	0.058824	NA	0.809524	0.02381	0.111111	0.047619	0.007937	NA	0.619835	0.198347	0.181818	0	0	0	0	NA	cold
Native	Bex	46.25	7.02	0.739583	0.104167	0.15625	0.327381	0.672619	0	0.482143	0.5	0.017857	0	0.742515	0	0.149701	0.02994	0	0.077844	0.757396	0.171598	0.04142	0	0.011834	0	0	0.017751	cold
Native	Wallis	46.17	7.5	0.587629	0.161512	0.250859	0.537919	0.462081	0	0.363316	0.379189	0.19224	0.065256	0.803351	0.028219	0.080247	0.027337	0.000882	0.059965	0.626432	0.218502	0.085463	0	0.01674	0	0	0.052863	cold
Native	Villars	45.22	0.62	0.829932	0.170068	NA	0.464865	0.535135	NA	0.473988	0.398844	0.127168	NA	0.730337	0.022472	0.196629	0.044944	0.005618	NA	0.478495	0.166667	0.33871	0.016129	0	0	0	NA	cold
Native	Villars	45.22	0.62	0.72973	0.27027	NA	0.511905	0.488095	NA	0.68125	0.175	0.14375	NA	0.625	0.059524	0.261905	0.053571	0	NA	0.393939	0.230303	0.357576	0.006061	0.012121	0	0	NA
Native	Fruska	44.4667	18.8667	0.361111	0.083333	0.555556	0.513889	0.486111	0	0.277778	0.319444	0.069444	0.333333	0.430556	0	0.013889	0.402778	0	0.152778	0.222222	0.375	0.013889	0	0.347222	0	0	0.041667
Native	Carasco	44.35	9.35	0.5	0.181818	0.318182	0.590909	0.409091	0	0.454545	0.125	0.136364	0.284091	0.465909	0.045455	0.306818	0.125	0	0.056818	0.238636	0.363636	0.147727	0	0.090909	0	0	0.159091
Native	Biaz	44.12	-0.22	0.491935	0.209677	0.298387	NA	NA	NA	0.090395	0.677966	0.180791	0.050847	0.659091	0.011364	0.198864	0.0625	0	0.068182	0.19774	0.627119	0.101695	0.050847	0.022599	0	0	0	cold
Native	Montpellier	43.6	3.88	0.794872	0.205128	NA	0.517442	0.482558	NA	0.560241	0.277108	0.162651	NA	0.692308	0.053254	0.171598	0.076923	0.005917	NA	0.614035	0.152047	0.210526	0	0.023392	0	0	NA	cold
Native	Montpellier	43.6	3.88	0.597701	0.16092	0.241379	0.520231	0.479769	0	0.537572	0.265896	0.156069	0.040462	0.676301	0.052023	0.16763	0.075145	0.00578	0.023121	0.612717	0.150289	0.208092	0	0.023121	0	0	0.00578	cold
Native	Montpellier	43.6	3.88	0.672598	0.327402	NA	0.554572	0.445428	NA	0.708589	0.134969	0.156442	NA	0.614925	0.095522	0.21194	0.065672	0.01194	NA	0.381988	0.332298	0.254658	0.009317	0.021739	0	0	NA
Native	Santander	43.47	-3.8	NA	NA	NA	NA	NA	NA	NA	NA	NA	NA	NA	NA	NA	NA	NA	NA	0.294118	0.117647	0.117647	0.397059	0.029412	0	0.029412	0.014706
Native	La_Coruña	43.37	-8.38	0.325	0.675	0	0.701299	0.298701	0	0.337662	0.038961	0.623377	0	0.623377	0.038961	0	0.142857	0.116883	0.077922	0.038462	0.076923	0.076923	0.730769	0	0	0	0.076923
Native	Garonne	43.35	1.37	0.682243	0.149533	0.168224	NA	NA	NA	0.529412	0.242647	0.191176	0.036765	0.79562	0.021898	0.131387	0.021898	0	0.029197	0.492647	0.227941	0.242647	0.022059	0.007353	0.007353	0	0	cold
Native	Bilbao	43.25	-2.97	0.153846	0.576923	0.269231	0.653846	0.346154	0	0.307692	0.038462	0.653846	0	0.44	0.28	0.2	0.08	0	0	0.192308	0.192308	0.153846	0.346154	0	0	0.038462	0.076923	warm
Native	Berbikiz	43.19	3.09	0.426	0.535	0	0.505	0.495	0	0.901	0.03	0.069	0	0.683	0.149	0.069	0.059	0.01	0.3	0.181	0.352	0.191	0.221	0.015	0	0.015	0.025
Native	Berbikiz	43.19	3.09	0.336	0.655	0	0.611	0.389	0	0.858	0.018	0.124	0	0.73	0.177	0.106	0	0.035	0.009	0.142	0.385	0.168	0.243	0.013	0	0.013	0.036
Native	Lagrasse	43.08	2.62	0.878788	0.121212	NA	0.578947	0.421053	NA	0.628571	0.171429	0.2	NA	0.594595	0.040541	0.27027	0.094595	0	NA	0.418919	0.175676	0.378378	0.027027	0	0	0	NA
Native	Lagrasse	43.08	2.62	0.717949	0.102564	0.179487	0.578947	0.421053	0	0.578947	0.157895	0.184211	0.078947	0.578947	0.039474	0.263158	0.092105	0	0.026316	0.407895	0.171053	0.368421	0.026316	0	0	0	0.026316
Native	Lagrasse	43.08	2.62	0.607143	0.392857	NA	0.590062	0.409938	NA	0.607595	0.170886	0.221519	NA	0.547771	0.095541	0.248408	0.089172	0.019108	NA	0.344156	0.285714	0.331169	0.006494	0.032468	0	0	NA
Native	Monte_Pedroso	42.88	8.57	0.263	0.737	0	0.61	0.39	0	0.822	0.017	0.161	0	0.67	0.152	0.11	0.009	0.042	0.017	0.051	0.438	0.14	0.255	0.026	0	0.013	0.077
Native	Monte_Pedroso	42.88	8.57	0.261	0.721	0.018	0.595	0.405	0	0.856	0	0.126	0.018	0.487	0.261	0.081	0.081	0.072	0.018	0.069	0.262	0.151	0.399	0.018	0	0.018	0.083
Native	Caralps	42.6	2.18	0.472222	0.444444	0.083333	0.671642	0.328358	0	0.597015	0.059701	0.343284	0	0.507463	0.104478	0.134328	0.208955	0	0.044776	0.402985	0.313433	0.074627	0.089552	0.014925	0	0	0.104478
Native	Corse	42.3	9.13	0.3	0.62	0.08	0.701031	0.298969	0	0.484536	0.010309	0.371134	0.134021	0.257732	0.268041	0.206186	0.113402	0.041237	0.113402	0.091837	0.234694	0.142857	0	0.05102	0	0	0.479592
Native	Queralbs	42.22	2.17	0.515152	0.484848	NA	0.671642	0.328358	NA	0.597015	0.059701	0.343284	NA	0.53125	0.109375	0.140625	0.09375	0.125	NA	0.45	0.35	0.083333	0.1	0.016667	0	0	NA	warm
Native	Queralbs	42.22	2.17	0.431818	0.568182	NA	0.72028	0.27972	NA	0.594406	0.048951	0.356643	NA	0.489051	0.211679	0.145985	0.124088	0.029197	NA	0.330645	0.33871	0.225806	0.080645	0.016129	0	0.008065	NA
Native	Sabadell	41.55	2.16	NA	NA	NA	NA	NA	NA	NA	NA	NA	NA	NA	NA	NA	NA	NA	NA	0.195	0.285	0.125	0.19	0.06	0	0.035	0.11
Native	Pedroso	41.55	-4.93	NA	NA	NA	NA	NA	NA	NA	NA	NA	NA	NA	NA	NA	NA	NA	NA	0.200606	0.148435	0.115786	0.462471	0.006059	0	0.023225	0.04342
Native	Zamora	41.5	-5.75	0.38	0.6	0.02	0.790909	0.209091	0	0.513514	0.018018	0.45045	0.018018	0.396396	0.144144	0.234234	0.189189	0.027027	0.009009	0.171171	0.162162	0.063063	0.585586	0	0	0.009009	0.009009	warm
Native	Zongul	41.45	31.82	0.46	0.32	0.22	0.78	0.17	0.05	0.62	0	0.02	0.36	0.12	0.02	0.08	0.33	0	0.45	0.1	0.19	0	0.49	0.01	0	0.08	0.13
Native	Tibidabo	41.42	2.12	0.445	0.496667	0.058333	0.277778	0.722222	0	0.507768	0.057236	0.429272	0.005724	0.415543	0.218874	0.168121	0.130056	0	0.067407	0.340461	0.253289	0.050164	0.262336	0.01398	0	0.01398	0.065789
Native	Barcelona	41.38	2.18	0.549724	0.337017	0.11326	0.737443	0.262557	0	0.510251	0.052392	0.407745	0.029613	0.315068	0.210046	0.230594	0.164384	0.020548	0.059361	0.318182	0.270455	0.120455	0.2	0.018182	0	0.013636	0.059091
Native	Samsun	41.28	36.33	0.4	0.14	0.46	0.61	0.32	0.07	0.74	0.04	0	0.22	0.2	0.06	0.2	0.17	0	0.37	0.09	0.14	0.01	0.06	0.03	0	0.02	0.65
Native	Formia	41.25	13.62	0.378378	0.378378	0.243243	0.789744	0.210256	0	0.409091	0.025974	0.246753	0.318182	0.126582	0.120253	0.43038	0.177215	0.063291	0.082278	0.105	0.525	0.095	0.015	0.055	0	0	0.205
Native	Trebisonda	41	39.72	0.24	0.38	0.38	0.71	0.2	0.09	0.6	0.11	0	0.29	0.24	0.05	0.17	0.16	0	0.38	0.06	0.19	0	0.19	0.06	0	0.07	0.43
Native	Ponza	40.9	12.97	0.295238	0.542857	0.161905	0.832669	0.167331	0	0.453333	0.031111	0.257778	0.257778	0.084071	0.154867	0.384956	0.185841	0.079646	0.110619	0.047244	0.551181	0.129921	0.003937	0.066929	0	0	0.200787	warm
Native	Ventot	40.8	13.43	0.333333	0.428571	0.238095	0.880952	0.119048	0	0.321429	0	0.321429	0.357143	0.083333	0.166667	0.22619	0.22619	0.130952	0.166667	0.071429	0.464286	0.119048	0	0.095238	0	0	0.25
Native	Thessaloniki	40.64	22.94	0.2375	0.35	0.4125	0.578947	0.421053	0	0.378947	0.147368	0.026316	0.447368	0.205263	0	0.126316	0.357895	0	0.310526	0.268421	0.521053	0	0	0.010526	0	0	0.2
Native	Alguer	40.57	8.32	0.088889	0.888889	0.022222	0.596685	0.392265	0.01105	0.116022	0	0.867403	0.016575	0.055249	0.519337	0.016575	0.071823	0.005525	0.331492	0.027624	0.508287	0.243094	0.005525	0	0	0	0.21547	warm
Native	Penarroya	40.4	-0.67	0.304348	0.677536	0.018116	0.773551	0.226449	0	0.440217	0.012681	0.547101	0	0.324275	0.347826	0.108696	0.153986	0.041667	0.023551	0.128623	0.222826	0.067029	0.389493	0.03442	0	0.04529	0.112319	warm
Native	Forest	40.38	8.98	0.108696	0.869565	0.021739	0.752688	0.236559	0.010753	0.11828	0	0.870968	0.010753	0.032258	0.612903	0.021505	0.010753	0	0.322581	0	0.586957	0.195652	0	0.01087	0	0	0.206522	warm
Native	Alfano	40.28	15.55	0.433333	0.466667	0.1	0.833333	0.166667	0	0.466667	0	0.283333	0.25	0.183333	0.116667	0.383333	0.15	0.05	0.116667	0.05	0.5	0.083333	0	0.116667	0	0	0.25
Native	Bursa	40.18	29.07	0.473684	0.289474	0.236842	0.763158	0.171053	0.065789	0.486842	0.013158	0.013158	0.486842	0.184211	0.013158	0.026316	0.381579	0	0.394737	0.026316	0.223684	0	0.513158	0.039474	0	0.092105	0.105263
Native	Menorca	40.07	4.2	0.428571	0.5	0.071429	0.722628	0.270073	0.007299	0.510949	0.109489	0.328467	0.051095	0.40146	0.145985	0.20438	0.058394	0	0.189781	0.145985	0.313869	0.350365	0.036496	0.072993	0	0.007299	0.072993
Native	Pindoe	39.67	23	0.327586	0.293103	0.37931	0.741176	0.247059	0.011765	0.285714	0.130952	0.02381	0.559524	0.186047	0.011628	0.034884	0.581395	0	0.186047	0.116279	0.488372	0.023256	0.05814	0.046512	0	0	0.267442
Native	Son_Servera	39.62	3.36	0.338843	0.644628	0.016529	0.808333	0.170833	0.020833	0.441667	0.008333	0.545833	0.004167	0.195021	0.228216	0.141079	0.062241	0	0.373444	0.2	0.404167	0.129167	0.120833	0.1125	0	0	0.033333
Native	Calvia	39.55	2.48	0.282051	0.717949	NA	0.794118	0.205882	NA	0.363636	0.006993	0.629371	NA	0.375	0.238636	0.306818	0.068182	0.011364	NA	0.204545	0.416667	0.234848	0.068182	0.075758	0	0	NA	warm
Native	Calvia	39.55	2.48	0.273973	0.684932	0.041096	0.769231	0.195804	0.034965	0.363636	0.006993	0.629371	0	0.232394	0.147887	0.190141	0.042254	0.007042	0.380282	0.195804	0.405594	0.230769	0.062937	0.076923	0	0	0.027972	warm
Native	Calvia	39.55	2.48	0.244444	0.755556	NA	0.805556	0.194444	NA	0.460938	0.019531	0.519531	NA	0.198347	0.198347	0.380165	0.173554	0.049587	NA	0.079602	0.263682	0.562189	0.064677	0.024876	0	0.004975	NA
Native	Ribarroja	39.55	-0.57	0.528302	0.471698	NA	0.803571	0.196429	NA	0.531532	0.027027	0.441441	NA	0.385321	0.220183	0.211009	0.12844	0.055046	NA	0.156863	0.27451	0.029412	0.421569	0.068627	0	0.04902	NA	warm
Native	Ribarroja	39.55	-0.57	0.383333	0.583333	0.033333	0.720339	0.279661	0	0.440678	0.042373	0.516949	0	0.347458	0.29661	0.101695	0.186441	0.050847	0.016949	0.20339	0.271186	0.050847	0.322034	0.016949	0	0.016949	0.118644	warm
Native	Ribarroja	39.55	-0.57	0.292683	0.707317	NA	0.776892	0.223108	NA	0.471774	0.028226	0.5	NA	0.292035	0.371681	0.150442	0.137168	0.048673	NA	0.168182	0.277273	0.090909	0.395455	0.036364	0	0.031818	NA
Native	Valencia	39.47	-0.37	0.441667	0.516667	0.041667	0.76087	0.23913	0	0.482609	0.034783	0	0.482609	0.373913	0.256522	0.152174	0.143478	0.052174	0.021739	0.17316	0.264069	0.038961	0.350649	0.038961	0	0.030303	0.103896
Native	Sette_fratelli	39.3	9.45	0.065574	0.934426	0	0.721311	0.278689	0	0.172131	0.016393	0.795082	0.016393	0.016393	0.778689	0.032787	0.008197	0.008197	0.155738	0.024	0.48	0.184	0	0.016	0	0	0.296	warm
Native	Goryachy	39.13	44.6	0.3125	0	0.6875	0.516129	0.451613	0.032258	0.387097	0.322581	0	0.290323	0.354839	0	0.193548	0	0	0.451613	0.645161	0.290323	0	0	0.032258	0	0	0.032258
Native	Prevez	38.95	20.73	0.46	0.18	0.36	0.816832	0.173267	0.009901	0.346535	0.049505	0.064356	0.539604	0.222772	0.019802	0.054455	0.480198	0	0.222772	0.188119	0.455446	0.019802	0.019802	0.029703	0	0	0.287129
Native	Ibiza	38.9	1.43	0.365031	0.607362	0.027607	0.766871	0.226994	0.006135	0.477064	0.015291	0.507645	0	0.297546	0.303681	0.153374	0.104294	0.046012	0.095092	0.148936	0.24924	0.057751	0.449848	0.027356	0	0.00304	0.06383	warm
Native	Adraga	38.79	-9.44	0.26	0.73	0.01	0.9	0.1	0	0.29	0.01	0.7	0	0.18	0.52	0.08	0.14	0.05	0.02	0.11	0.53	0.03	0.25	0.01	0	0.01	0.06	warm
Native	Lisbon	38.72	-9.13	0.272727	0.590909	0.136364	0.715909	0.284091	0	0.295455	0.011364	0.693182	0	0.170455	0.238636	0	0.522727	0	0.068182	0.113636	0.125	0.090909	0.670455	0	0	0	0	warm
Native	Ilha_Terceira	38.72	-27.27	0.424242	0.575758	0	0.803922	0.196078	0	0.956522	0	0.043478	0	0.355556	0	0.644444	0	0	0	0.043478	0.804348	0.152174	0	0	0	0	0	warm
Native	Ustica	38.7	13.17	0.208333	0.604167	0.1875	0.96875	0.03125	0	0.125	0.010417	0.71875	0.145833	0	0.53125	0.1875	0.114583	0.125	0.041667	0.010417	0.666667	0.166667	0	0.0625	0	0	0.09375	warm
Native	Karpen	38.67	20.87	0.417722	0.253165	0.329114	NA	NA	NA	0.371795	0	0.064103	0.564103	NA	NA	NA	NA	NA	NA	0.121019	0.585987	0.012739	0.031847	0.031847	0	0	0.216561
Native	Faial	38.57	-28.7	NA	NA	NA	NA	NA	NA	NA	NA	NA	NA	NA	NA	NA	NA	NA	NA	0.266667	0.607407	0.125926	0	0	0	0	0
Native	Lipari	38.47	14.95	0.351351	0.567568	0.081081	0.932432	0.067568	0	0.260274	0.013699	0.534247	0.191781	0.013514	0.378378	0.243243	0.202703	0.094595	0.067568	0.013333	0.626667	0.146667	0.013333	0.08	0	0	0.12	warm
Native	Villar	38.43	-2.33	0.21875	0.78125	0	0.906977	0.093023	0	0.5	0	0.5	0	0.384615	0.252747	0.175824	0.10989	0.076923	0	0	0.258427	0.011236	0.707865	0	0	0.022472	0	warm
Native	Kefalonia	38.25	20.58	0.533333	0.3	0.166667	NA	NA	NA	0.387097	0	0.112903	0.5	NA	NA	NA	NA	NA	NA	0.196721	0.52459	0.016393	0	0.065574	0.065574	0	0.131148
Native	Parnes	38.18	23.7	0.466102	0.278249	0.25565	0.836519	0.158207	0.005274	0.346306	0.01715	0.033641	0.602902	0.144043	0.024896	0.061648	0.547718	0.001186	0.22051	0.126691	0.4631	0.01476	0.04674	0.038745	0.00123	0.00123	0.307503
Native	Cinisi	38.13	13.52	0.105769	0.884615	0.009615	0.956522	0.043478	0	0.154545	0	0.772727	0.072727	0	0.434783	0.2	0.095652	0.26087	0.008696	0.008772	0.719298	0.201754	0.008772	0	0	0	0.061404	warm
Native	Athens	37.97	23.72	0.65	0.125	0.225	NA	NA	NA	0.278481	0	0.025316	0.696203	NA	NA	NA	NA	NA	NA	0.075	0.475	0.075	0.05	0.025	0.075	0	0.225
Native	Cordoba	37.83	-4.77	NA	NA	NA	NA	NA	NA	NA	NA	NA	NA	NA	NA	NA	NA	NA	NA	0.078947	0.121053	0.031579	0.678947	0.005263	0	0.036842	0.047368
Native	Sicily	37.77	15	0	1	0	0.90625	0.09375	0	0.0625	0	0.90625	0.03125	0	0.578125	0.140625	0.03125	0.203125	0.046875	0	0.71875	0.203125	0	0.046875	0	0	0.03125	warm
Native	Pinhal	37.67	-25.47	0.4	0.6	0	0.9375	0.0625	0	0.685185	0	0.314815	0	0.488889	0.022222	0.488889	0	0	0	0.025	0.725	0.25	0	0	0	0	0	warm
Native	Poros	37.38	23.33	0.372549	0.27451	0.352941	NA	NA	NA	0.327273	0.009091	0.018182	0.645455	0.153153	0	0.072072	0.45045	0	0.324324	0.272727	0.390909	0.063636	0.027273	0.036364	0.009091	0	0.2
Native	Bizerte	37.28	9.87	0.039474	0.25	0.710526	0.962025	0.037975	0	0.289474	0.013158	0.657895	0.039474	0.04878	0.097561	0.707317	0.02439	0	0.121951	0.019139	0.100478	0.684211	0	0	0	0	0.196172
Native	Rasht	37.27	49.6	0.01	0.03	0.96	0.3	0.68	0.02	0.995	0	0	0.005	0.425	0	0.51	0.065	0	0	0	0.995	0	0	0.005	0	0	0
Native	Huelva	37.27	-6.95	0.371429	0.628571	0	0.719178	0.280822	0	0	0.445205	0.554795	0	0.193103	0.406897	0.172414	0.096552	0.096552	0.034483	0.047945	0.116438	0.061644	0.732877	0	0	0.020548	0.020548	warm
Native	PuntaUmbria	37.17	-6.95	0.272727	0.727273	NA	0.756098	0.243902	NA	0.454545	0.008264	0.53719	NA	0.307692	0.324786	0.17094	0.111111	0.08547	NA	0.069565	0.278261	0.156522	0.486957	0.008696	0	0	NA	warm
Native	PuntaUmbria	37.17	-6.95	0.366197	0.633803	NA	0.719178	0.280822	NA	0.444444	0	0.555556	NA	0.201439	0.417266	0.179856	0.100719	0.100719	NA	0.048951	0.118881	0.062937	0.748252	0	0	0.020979	NA	warm
Native	sao_Pedro	36.99	-25.1	0.291667	0.708333	0	0.9	0.1	0	0.961538	0	0.038462	0	0.375	0.0625	0.53125	0.03125	0	0	0.030303	0.848485	0.121212	0	0	0	0	0	warm
Native	Tabark	36.95	8.75	0.023256	0.232558	0.744186	0.987013	0.012987	0	0.233766	0	0.766234	0	0	0.064935	0.649351	0	0	0.285714	0	0.012987	0.558442	0	0	0	0	0.428571
Native	Tarsus	36.92	34.88	0.58	0.22	0.2	0.67	0.15	0.18	0.55	0.01	0.01	0.43	0.15	0.09	0.05	0.39	0.01	0.31	0.04	0.21	0	0.32	0.02	0	0.15	0.26
Native	Antaly	36.88	30.7	0.52	0.34	0.14	0.81	0.08	0.11	0	0	0.03	0.97	0.04	0.03	0.03	0.44	0	0.46	0.03	0.13	0	0.56	0.04	0	0.05	0.19
Native	Almeria	36.87	-2.45	0.34	0.66	0	0.830769	0.169231	0	0.471795	0.020513	0.497436	0.010256	0.28866	0.304124	0.164948	0.118557	0	0.123711	0.148718	0.25641	0.046154	0.425641	0.030769	0	0.015385	0.076923	warm
Native	Vytina	36.8	22.17	0.657143	0.2	0.142857	NA	NA	NA	0.416667	0	0.041667	0.541667	NA	NA	NA	NA	NA	NA	0.114286	0.457143	0.028571	0.028571	0	0.028571	0	0.342857
Native	Orange	36.8	10.18	0.041475	0.202765	0.75576	0.978437	0.021563	0	0.280323	0	0.71159	0.008086	0.02981	0.03794	0.579946	0.01626	0.00813	0.327913	0.008086	0.026954	0.792453	0.005391	0.002695	0	0	0.16442
Native	Tunis	36.8	10.17	0.041885	0.209424	0.748691	0.96793	0.03207	0	0.22449	0.002915	0.763848	0.008746	0.014577	0.03207	0.658892	0.011662	0	0.282799	0.01462	0.049708	0.725146	0.005848	0	0	0	0.204678
Native	Ain_Draham	36.78	8.7	0.013699	0.205479	0.780822	0.962121	0.037879	0	0.280303	0	0.712121	0.007576	0.007576	0.007576	0.628788	0.007576	0.022727	0.325758	0	0.015152	0.772727	0	0	0	0	0.212121
Native	Ronda	36.73	-5.17	NA	NA	NA	NA	NA	NA	NA	NA	NA	NA	NA	NA	NA	NA	NA	NA	0.097561	0.121951	0	0.756098	0	0	0	0.02439
Native	Malaga	36.72	-4.42	0.305556	0.694444	NA	0.777778	0.222222	NA	0.481203	0.007519	0.511278	NA	0.296	0.24	0.136	0.144	0.184	NA	0.066667	0.066667	0.02963	0.8	0.014815	0	0.022222	NA	warm
Native	Malaga	36.72	-4.42	0.285714	0.649351	0.064935	0.777778	0.222222	0	0.474074	0.007407	0.503704	0.014815	0.274074	0.222222	0.125926	0.133333	0.17037	0.074074	0.066667	0.066667	0.02963	0.8	0.014815	0	0.022222	0	warm
Native	Malaga	36.72	-4.42	0.240385	0.759615	NA	0.753333	0.246667	NA	0.455782	0.006803	0.537415	NA	0.144928	0.391304	0.152174	0.202899	0.108696	NA	0.088235	0.375	0.073529	0.419118	0.022059	0	0.022059	NA	warm
Native	Chalus	36.63	51.43	0.055556	0.111111	0.833333	0.583333	0.361111	0.055556	0.944444	0	0	0.055556	0.666667	0.027778	0.083333	0.166667	0	0.055556	0	0.944444	0	0	0.055556	0	0	0
Native	Shahi	36.47	52.88	0	0	1	0.422222	0.577778	0	0.988889	0	0	0.011111	0.377778	0	0.244444	0.355556	0	0.022222	0	0.988889	0	0	0.011111	0	0	0
Native	Silifk	36.37	33.93	0.64	0.28	0.08	0.8	0.15	0.05	0.48	0.01	0.01	0.5	NA	NA	NA	NA	NA	NA	0.04	0.14	0	0.43	0.08	0	0.06	0.25
Native	Tanger	35.8	-5.75	0.105263	0.526316	0.368421	0.973684	0.026316	0	0.421053	0	0.578947	0	0.052632	0.236842	0.105263	0	0.394737	0.210526	0.052632	0.236842	0.210526	0.447368	0.026316	0	0	0.026316	warm
Native	Crete	35.48	24.7	0.434783	0.434783	0.130435	0.5	0.064516	0.435484	0.071429	0.005952	0.595238	0.327381	0.02439	0	0.853659	0.083624	0	0.038328	0.018735	0.152225	0.744731	0.002342	0.007026	0	0	0.074941
Native	Chechouen	35	-5.5	0.131579	0.342105	0.526316	0.814815	0.185185	0	0.070175	0	0.929825	0	0	0.101695	0.016949	0.033898	0.440678	0.40678	0	0.258065	0.693548	0	0.048387	0	0	0
Native	Gabes	33.88	10.12	0.035714	0.107143	0.857143	1	0	0	0.25	0	0.75	0	0.089286	0.017857	0.178571	0	0.017857	0.696429	0	0	0.821429	0	0	0	0	0.178571
Native	Nahari	33.02	35.83	NA	NA	NA	0.125	0	0.875	0.25	0	0.125	0.625	0	0.333333	0.111111	0.222222	0.111111	0.222222	0	0.25	0	0	0.375	0	0	0.375
Native	Madeira	32.83	-17	0.110497	0.883978	0.005525	0.902077	0.097923	0	0.652299	0	0.347701	0	0.297376	0.271137	0.402332	0.023324	0.005831	0	0.023669	0.964497	0	0	0.011834	0	0	0	warm
Native	Horon	31.83	35	0.064516	0.919355	0.016129	0.039801	0.074627	0.885572	0.025126	0	0	0.974874	0.015075	0.557789	0	0.271357	0	0.155779	0	0.070352	0	0.035176	0.854271	0	0	0.040201
Native	Qiryat	31.78	35.12	0.070175	0.921053	0.008772	0.174089	0.026316	0.799595	0.048583	0	0.728745	0.222672	0.002028	0.614604	0.002028	0.255578	0.004057	0.121704	0	0.04251	0	0.030364	0.91498	0	0	0.012146
Native	Essaouira	31.5	-9.78	0.172414	0.413793	0.413793	0.964286	0.035714	0	0.267857	0	0.732143	0	0.125	0.267857	0.071429	0.017857	0.446429	0.071429	0.035714	0.321429	0.553571	0.089286	0	0	0	0
Native	Asni	31.23	-7.92	0.074074	0.419753	0.506173	0.987342	0.012658	0	0.28481	0	0.71519	0	0.082278	0.278481	0.06962	0.025316	0.449367	0.094937	0.006329	0.227848	0.670886	0.094937	0	0	0	0
Native	Alexandria	31.21	29.91	0.707317	0.146341	0.146341	0.853659	0.097561	0.04878	0.45122	0.012195	0.012195	0.52439	0.097561	0.121951	0.060976	0.487805	0	0.231707	0.02439	0.207317	0.036585	0.47561	0.036585	0	0.02439	0.195122
Native	Agadir	30.43	-9.6	0.096774	0.516129	0.387097	0.962963	0.037037	0	0.148148	0	0.851852	0	0.074074	0.314815	0.037037	0.037037	0.314815	0.222222	0	0.296296	0.62963	0.074074	0	0	0	0	warm
Native	Los_Tilos	28.75	-17.67	0	1	0	0.934211	0.065789	0	0.881579	0	0.118421	0	0.105263	0.539474	0.026316	0.013158	0	0.315789	0	1	0	0	0	0	0	0	warm
Native	El_Pinar	28.7	-17.92	0	0.954545	0.045455	0.931818	0.068182	0	0.840909	0	0.159091	0	0.090909	0.340909	0	0	0	0.568182	0	1	0	0	0	0	0	0
Native	Tenerife	28.32	-16.57	0	1	0	0.998505	0.001495	0	0.79792	0	0.20208	0	0.198171	0.431402	0.079268	0.036585	0	0.254573	0	1	0	0	0	0	0	0	warm
Native	Guia/Canary	28.13	-15.63	0	0.975	0.025	1	0	0	0.75641	0	0.24359	0	0	0.538462	0.141026	0.025641	0	0.294872	0.012821	0.987179	0	0	0	0	0	0	warm
Native	El_Cedro	28.12	-17.2	0	1	0	0.98	0.02	0	0.82	0	0.18	0	0.04	0.6	0.12	0.04	0	0.2	0.02	0.98	0	0	0	0	0	0	warm
Introduced	PortHardy	50.7	-127.5	0.666667	0.333333	0	0.649123	0.350877	0	0.22807	0.684211	0.087719	0	0.857143	0	0.053571	0.017857	0.071429	0	0.350877	0.122807	0.070175	0	0.280702	0.175439	0	0
Introduced	Bellingham	48.7	-122.14	0.546296	0.453704	0	0.648649	0.351351	0	0.409091	0.509091	0.081818	0	0.756757	0.045045	0.027027	0.045045	0.126126	0	0.279279	0.081081	0.261261	0.027027	0.297297	0.054054	0	0
Introduced	Bellingham	48.7	-122.14	0.721311	0.278689	0	0.539683	0.460317	0	0.177419	0.612903	0.209677	0	0.714286	0.047619	0.031746	0.047619	0.15873	0	0.258065	0.064516	0.241935	0.064516	0.306452	0.064516	0	0
Introduced	Bellingham	48.7	-122.14	0.552239	0.447761	0	0.641791	0.358209	0	0.335821	0.41791	0.246269	0	0.723881	0.022388	0.067164	0.029851	0.156716	0	0.208955	0.164179	0.30597	0	0.261194	0.059701	0	0
Introduced	Arlington	48.18	-122.12	0.53125	0.46875	0	0.640449	0.359551	0	0.337079	0.483146	0.179775	0	0.668539	0.061798	0.005618	0.11236	0.151685	0	0.314607	0.02809	0.235955	0.08427	0.280899	0.05618	0	0
Introduced	Centralia	46.7	-122.96	0.561538	0.438462	0	0.635294	0.364706	0	0.394118	0.411765	0.194118	0	0.741176	0.029412	0.017647	0.082353	0.129412	0	0.3	0.035294	0.247059	0.023529	0.288235	0.105882	0	0
Introduced	Centralia	46.7	-122.96	0.540541	0.459459	0	0.583333	0.416667	0	0.373494	0.518072	0.108434	0	0.797619	0.047619	0.011905	0.083333	0.059524	0	0.357143	0.083333	0.214286	0	0.214286	0.130952	0	0
Introduced	Centralia	46.7	-122.96	0.6875	0.3125	0	0.658537	0.341463	0	0.240964	0.626506	0.13253	0	0.650602	0.072289	0.036145	0.108434	0.13253	0	0.26506	0.060241	0.337349	0.024096	0.192771	0.120482	0	0
Introduced	Centralia	46.7	-122.96	0.691781	0.308219	0	0.636678	0.363322	0	0.355634	0.485915	0.158451	0	0.699647	0.063604	0.010601	0.091873	0.134276	0	0.223368	0.130584	0.285223	0.020619	0.254296	0.082474	0.003436	0
Introduced	Centralia	46.7	-122.96	0.584906	0.415094	0	0.575472	0.424528	0	0.367925	0.490566	0.141509	0	0.622642	0.066038	0.028302	0.056604	0.226415	0	0.198113	0.245283	0.207547	0.037736	0.283019	0.028302	0	0
Introduced	Woodburn	45.13	-122.85	0.578947	0.421053	0	0.7	0.3	0	0.323944	0.464789	0.211268	0	0.633803	0.098592	0.056338	0.098592	0.112676	0	0.242857	0.042857	0.128571	0.171429	0.328571	0.085714	0	0
Introduced	Salem	44.9	-123.02	0.614035	0.385965	0	0.573333	0.426667	0	0.364865	0.486486	0.148649	0	0.72	0.053333	0.013333	0.066667	0.146667	0	0.186667	0.12	0.226667	0.08	0.346667	0.04	0	0
Introduced	Salem	44.9	-123.02	0.471429	0.528571	0	0.513514	0.486486	0	0.205479	0.561644	0.232877	0	0.684932	0.09589	0.013699	0.082192	0.123288	0	0.324324	0.148649	0.243243	0.054054	0.216216	0.013514	0	0
Introduced	Salem	44.9	-123.02	0.562963	0.437037	0	0.607407	0.392593	0	0.214815	0.548148	0.237037	0	0.681481	0.074074	0.014815	0.02963	0.2	0	0.192593	0.244444	0.207407	0.02963	0.288889	0.037037	0	0
Introduced	Medford	42.3	-122.88	0.594937	0.405063	0	0.553191	0.446809	0	0.319149	0.414894	0.265957	0	0.659574	0.074468	0.021277	0.159574	0.085106	0	0.148936	0.021277	0.234043	0.074468	0.457447	0.06383	0	0
Introduced	Medford	42.3	-122.88	0.5	0.5	0	0.547945	0.452055	0	0.346667	0.413333	0.24	0	0.567568	0.148649	0.067568	0.108108	0.108108	0	0.216216	0.040541	0.175676	0.067568	0.459459	0.040541	0	0
Introduced	Medford	42.3	-122.88	0.572917	0.427083	0	0.529412	0.470588	0	0.431373	0.352941	0.215686	0	0.588235	0.107843	0.019608	0.156863	0.127451	0	0.137255	0.098039	0.303922	0.098039	0.343137	0.019608	0	0
Introduced	Medford	42.3	-122.88	0.603306	0.396694	0	0.61157	0.38843	0	0.338843	0.322314	0.338843	0	0.561983	0.057851	0.057851	0.181818	0.140496	0	0.115702	0.247934	0.173554	0.057851	0.38843	0.016529	0	0
Introduced	Eureka	40.8	-124.16	0.5375	0.4625	0	0.580645	0.419355	0	0.360759	0.436709	0.202532	0	0.621118	0.086957	0.012422	0.186335	0.093168	0	0.269231	0.032051	0.185897	0.096154	0.339744	0.076923	0	0
Introduced	Eureka	40.8	-124.16	0.550725	0.449275	0	0.635135	0.364865	0	0.222222	0.625	0.152778	0	0.716216	0.094595	0.013514	0.067568	0.108108	0	0.27027	0.081081	0.216216	0.027027	0.378378	0.027027	0	0
Introduced	Eureka	40.8	-124.16	0.433333	0.566667	0	0.625	0.375	0	0.241935	0.564516	0.193548	0	0.65625	0.0625	0.046875	0.125	0.109375	0	0.396825	0.079365	0.15873	0.047619	0.285714	0.031746	0	0
Introduced	Eureka	40.8	-124.16	0.551724	0.448276	0	0.62069	0.37931	0	0.373913	0.365217	0.26087	0	0.612069	0.068966	0.060345	0.060345	0.198276	0	0.12931	0.198276	0.206897	0.12069	0.336207	0.008621	0	0
Introduced	Davis	38.6	-121.7	0.53719	0.46281	0	0.58952	0.41048	0	0.36087	0.330435	0.308696	0	0.517241	0.112069	0.021552	0.25	0.099138	0	0.176211	0.030837	0.193833	0.211454	0.370044	0.017621	0	0
Introduced	Davis	38.6	-121.7	0.481928	0.518072	0	0.650602	0.349398	0	0.452381	0.285714	0.261905	0	0.541176	0.117647	0.047059	0.211765	0.082353	0	0.095238	0.166667	0.214286	0.107143	0.416667	0	0	0
Introduced	Davis	38.6	-121.7	0.538462	0.461538	0	0.61	0.39	0	0.363636	0.393939	0.242424	0	0.65	0.03	0.02	0.23	0.07	0	0.15	0.11	0.19	0.23	0.31	0.01	0	0
Introduced	Davis	38.6	-121.7	0.5	0.5	0	0.636364	0.363636	0	0.318182	0.329545	0.352273	0	0.488636	0.090909	0.056818	0.193182	0.170455	0	0.136364	0.079545	0.238636	0.159091	0.363636	0.022727	0	0
Introduced	Gilroy	37	-121.58	0.521127	0.478873	0	0.631206	0.368794	0	0.384615	0.27972	0.335664	0	0.514085	0.098592	0.021127	0.225352	0.140845	0	0.148936	0.078014	0.163121	0.198582	0.397163	0.007092	0.007092	0
Introduced	Gilroy	37	-121.58	0.513514	0.486486	0	0.6	0.4	0	0.462366	0.247312	0.290323	0	0.589474	0.042105	0.010526	0.231579	0.126316	0	0.105263	0.052632	0.284211	0.231579	0.284211	0.042105	0	0
Introduced	Gilroy	37	-121.58	0.586207	0.413793	0	0.6875	0.3125	0	0.315789	0.231579	0.452632	0	0.53125	0.114583	0.041667	0.125	0.1875	0	0.208333	0.0625	0.260417	0.177083	0.28125	0.010417	0	0
Introduced	Gilroy	37	-121.58	0.630769	0.369231	0	0.723077	0.276923	0	0.338462	0.246154	0.415385	0	0.492308	0.153846	0.030769	0.123077	0.2	0	0.061538	0.123077	0.215385	0.153846	0.446154	0	0	0
Introduced	Viña_del_Mar	-33.01	-71.52	0.444444	0.555556	0	0.763158	0.236842	0	0.358974	0.435897	0.205128	0	0.473684	0.052632	0	0.236842	0.236842	0	0.263158	0.026316	0.210526	0.157895	0.342105	0	0	0
Introduced	Viña_del_Mar	-33.01	-71.52	0.505263	0.494737	0	0.777778	0.222222	0	0.337748	0.410596	0.251656	0	0.529801	0.119205	0	0.198675	0.152318	0	0.152318	0.013245	0.205298	0.264901	0.337748	0.02649	0	0
Introduced	Santiago	-34.45	-70.67	0.396825	0.603175	0	0.783505	0.216495	0	0.376289	0.463918	0.159794	0	0.502618	0.115183	0	0.146597	0.235602	0	0.239583	0.020833	0.192708	0.15625	0.359375	0.026042	0.005208	0
Introduced	Santiago	-34.45	-70.67	0.463918	0.536082	0	0.729323	0.270677	0	0.30597	0.447761	0.246269	0	0.448529	0.139706	0.007353	0.132353	0.272059	0	0.214815	0.051852	0.17037	0.162963	0.311111	0.081481	0.007407	0
Introduced	Santiago	-34.45	-70.67	0.488889	0.511111	0	0.8	0.2	0	0.355556	0.407407	0.237037	0	0.466667	0.214815	0	0.081481	0.237037	0	0.214815	0.096296	0.155556	0.140741	0.377778	0.014815	0	0
Introduced	Chillan	-36.6	-72.12	0.46	0.54	0	0.656652	0.343348	0	0.305936	0.520548	0.173516	0	0.623256	0.111628	0.004651	0.074419	0.186047	0	0.275229	0.050459	0.188073	0.105505	0.325688	0.055046	0	0
Introduced	Chillan	-36.6	-72.12	0.371212	0.628788	0	0.646617	0.353383	0	0.345865	0.413534	0.233083	0.007519	0.443609	0.180451	0.007519	0.06015	0.308271	0	0.240602	0.142857	0.105263	0.097744	0.315789	0.097744	0	0
Introduced	Laja	-37.27	-72.7	0.516667	0.483333	0	0.705686	0.294314	0	0.299003	0.508306	0.192691	0	0.538206	0.136213	0.009967	0.186047	0.129568	0	0.208191	0.044369	0.221843	0.133106	0.337884	0.051195	0.003413	0
Introduced	Laja	-37.27	-72.7	0.568807	0.431193	0	0.770833	0.229167	0	0.291667	0.520833	0.1875	0	0.5	0.173611	0	0.152778	0.173611	0	0.180556	0.020833	0.215278	0.131944	0.340278	0.111111	0	0
Introduced	Laja	-37.27	-72.7	0.468966	0.531034	0	0.689655	0.310345	0	0.255172	0.441379	0.303448	0	0.565517	0.206897	0.006897	0.062069	0.158621	0	0.172414	0.117241	0.186207	0.124138	0.324138	0.075862	0	0
Introduced	Valdivia	-39.8	-72.33	0.5	0.5	0	0.795699	0.204301	0	0.315217	0.521739	0.163043	0	0.629032	0.107527	0.005376	0.112903	0.145161	0	0.152632	0.052632	0.242105	0.073684	0.384211	0.094737	0	0
Introduced	Valdivia	-39.8	-72.33	0.634146	0.365854	0	0.757764	0.242236	0	0.36646	0.459627	0.173913	0	0.590062	0.149068	0.006211	0.149068	0.10559	0	0.26087	0.049689	0.285714	0.111801	0.217391	0.068323	0.006211	0
Introduced	Valdivia	-39.8	-72.33	0.560284	0.439716	0	0.647887	0.352113	0	0.21831	0.485915	0.295775	0	0.528169	0.183099	0.021127	0.070423	0.197183	0	0.169014	0.091549	0.253521	0.140845	0.309859	0.035211	0	0
Introduced	Bariloche	-41.15	-71.3	0.5	0.5	0	0.593985	0.406015	0	0.285714	0.556391	0.157895	0	0.669173	0.075188	0	0.037594	0.218045	0	0.240602	0.030075	0.240602	0.105263	0.293233	0.090226	0	0
Introduced	Bariloche	-41.15	-71.3	0.523256	0.476744	0	0.661157	0.338843	0	0.264463	0.504132	0.231405	0	0.652893	0.082645	0	0.099174	0.165289	0	0.322314	0.024793	0.165289	0.099174	0.264463	0.123967	0	0
Introduced	Puert_Montt	-41.47	-72.94	0.410959	0.589041	0	0.69863	0.30137	0	0.321918	0.472603	0.205479	0	0.568493	0.123288	0	0.089041	0.219178	0	0.246575	0.020548	0.157534	0.130137	0.315068	0.130137	0	0
Introduced	Puert_Montt	-41.47	-72.94	0.454545	0.545455	0	0.809524	0.190476	0	0.319728	0.503401	0.176871	0	0.564626	0.156463	0	0.095238	0.183673	0	0.258503	0.006803	0.204082	0.108844	0.292517	0.129252	0	0
Introduced	Puert_Montt	-41.47	-72.94	0.507463	0.492537	0	0.696296	0.303704	0	0.348148	0.422222	0.22963	0	0.592593	0.162963	0.037037	0.059259	0.148148	0	0.288889	0.081481	0.17037	0.125926	0.251852	0.074074	0.007407	0
Introduced	Castro	-42.5	-73.77	0.431034	0.568966	0	0.658333	0.341667	0	0.369748	0.495798	0.134454	0	0.644068	0.042373	0	0.110169	0.20339	0	0.226891	0.016807	0.184874	0.168067	0.302521	0.10084	0	0
Introduced	Coyhaique	-45.57	-72.07	0.559322	0.440678	0	0.707317	0.292683	0	0.229508	0.581967	0.188525	0	0.658537	0.073171	0	0.105691	0.162602	0	0.341463	0.01626	0.308943	0.03252	0.243902	0.056911	0	0
Introduced	Coyhaique	-45.57	-72.07	0.630952	0.369048	0	0.60177	0.39823	0	0.345133	0.522124	0.132743	0	0.743363	0.053097	0	0.079646	0.123894	0	0.256637	0.079646	0.176991	0.026549	0.318584	0.141593	0	0
Introduced	Coyhaique	-45.57	-72.07	0.524823	0.475177	0	0.732394	0.267606	0	0.316901	0.457746	0.225352	0	0.788732	0.077465	0	0.042254	0.091549	0	0.28169	0.161972	0.183099	0.077465	0.239437	0.056338	0	0
